# Supplementary material for: Arrayed CRISPRi and quantitative imaging describe the morphotypic landscape of essential mycobacterial genes
Source: eLife. 2020 Nov 6;9:e60083. doi: 10.7554/eLife.60083 (PMC7647400; doi:10.7554/eLife.60083)
Supplement: Supplementary file 1. [file elife-60083-supp1.xlsx]

## Sheet: sequence-based reagent
Reagent type (species) or resource	Designation	Source or refrence	Identifiers	Additional Information
sequence-based reagent	Golden_Gate_F	This Study	PCR Primer	ACTTCGGCTCTTCGGGATCTGACCAGGGAAAATAGC
sequence-based reagent	Golden_Gate_R	This Study	PCR Primer	ACTTCGGCTCTTCGCTGAAAATAAAAAAGGGGACCTCTAG
sequence-based reagent	MSMEG_0001_Bottom	This Study	Annealing Oligonuceotide	AAACCGGAAGCGTTCTGGTGTCCGGAC
sequence-based reagent	MSMEG_0001_Top	This Study	Annealing Oligonuceotide	GGGAGTCCGGACACCAGAACGCTTCCG
sequence-based reagent	MSMEG_0005_Bottom	This Study	Annealing Oligonuceotide	AAACAACAAGGGCCTGACCATCGAGC
sequence-based reagent	MSMEG_0005_Top	This Study	Annealing Oligonuceotide	GGGAGCTCGATGGTCAGGCCCTTGTT
sequence-based reagent	MSMEG_0006_Bottom	This Study	Annealing Oligonuceotide	AAACACCACACAGGGTCGCGTGTAC
sequence-based reagent	MSMEG_0006_Top	This Study	Annealing Oligonuceotide	GGGAGTACACGCGACCCTGTGTGGT
sequence-based reagent	MSMEG_0028_Bottom	This Study	Annealing Oligonuceotide	AAACCCGATACGAACTCGGTGAGAT
sequence-based reagent	MSMEG_0028_Top	This Study	Annealing Oligonuceotide	GGGAATCTCACCGAGTTCGTATCGG
sequence-based reagent	MSMEG_0030_Bottom	This Study	Annealing Oligonuceotide	AAACGGGCAACGGGCGCTATTGTGGGC
sequence-based reagent	MSMEG_0030_Top	This Study	Annealing Oligonuceotide	GGGAGCCCACAATAGCGCCCGTTGCCC
sequence-based reagent	MSMEG_0250_Bottom	This Study	Annealing Oligonuceotide	AAACAAATCGATCACCTACGCCAT
sequence-based reagent	MSMEG_0250_Top	This Study	Annealing Oligonuceotide	GGGAATGGCGTAGGTGATCGATTT
sequence-based reagent	MSMEG_0317_Bottom	This Study	Annealing Oligonuceotide	AAACGGCTCGGTGCTGCCCTGCTGAT
sequence-based reagent	MSMEG_0317_Top	This Study	Annealing Oligonuceotide	GGGAATCAGCAGGGCAGCACCGAGCC
sequence-based reagent	MSMEG_0384_Bottom	This Study	Annealing Oligonuceotide	AAACCCGGCGGATCCGGTACCAGGC
sequence-based reagent	MSMEG_0384_Top	This Study	Annealing Oligonuceotide	GGGAGCCTGGTACCGGATCCGCCGG
sequence-based reagent	MSMEG_0690_Bottom	This Study	Annealing Oligonuceotide	AAACGGTTCGCACACCGGCGGCGC
sequence-based reagent	MSMEG_0690_Top	This Study	Annealing Oligonuceotide	GGGAGCGCCGCCGGTGTGCGAACC
sequence-based reagent	MSMEG_0759_Bottom	This Study	Annealing Oligonuceotide	AAACAGGCGTACACCACGCGCGTC
sequence-based reagent	MSMEG_0759_Top	This Study	Annealing Oligonuceotide	GGGAGACGCGCGTGGTGTACGCCT
sequence-based reagent	MSMEG_0880_Bottom	This Study	Annealing Oligonuceotide	AAACTGGTCAGCTCGAAGGTCTCGAC
sequence-based reagent	MSMEG_0880_Top	This Study	Annealing Oligonuceotide	GGGAGTCGAGACCTTCGAGCTGACCA
sequence-based reagent	MSMEG_0903_Bottom	This Study	Annealing Oligonuceotide	AAACGAGCCGGTCCCGGTGGATAC
sequence-based reagent	MSMEG_0903_Top	This Study	Annealing Oligonuceotide	GGGAGTATCCACCGGGACCGGCTC
sequence-based reagent	MSMEG_0928_Bottom	This Study	Annealing Oligonuceotide	AAACCCGGCGGGTCCAACGTGGTGC
sequence-based reagent	MSMEG_0928_Top	This Study	Annealing Oligonuceotide	GGGAGCACCACGTTGGACCCGCCGG
sequence-based reagent	MSMEG_0949_Bottom	This Study	Annealing Oligonuceotide	AAACGCATCGCATATGCGCAGGCC
sequence-based reagent	MSMEG_0949_Top	This Study	Annealing Oligonuceotide	GGGAGGCCTGCGCATATGCGATGC
sequence-based reagent	MSMEG_0952_Bottom	This Study	Annealing Oligonuceotide	AAACGGCGGTCTGTCGGTGATCGGGC
sequence-based reagent	MSMEG_0952_Top	This Study	Annealing Oligonuceotide	GGGAGCCCGATCACCGACAGACCGCC
sequence-based reagent	MSMEG_0953_Bottom	This Study	Annealing Oligonuceotide	AAACACCGGTCGGTGCGATCGCTGAAGT
sequence-based reagent	MSMEG_0953_Top	This Study	Annealing Oligonuceotide	GGGAACTTCAGCGATCGCACCGACCGGT
sequence-based reagent	MSMEG_0954_Bottom	This Study	Annealing Oligonuceotide	AAACGGCGTGAAGATCGCCTGCGT
sequence-based reagent	MSMEG_0954_Top	This Study	Annealing Oligonuceotide	GGGAACGCAGGCGATCTTCACGCC
sequence-based reagent	MSMEG_0956_Bottom	This Study	Annealing Oligonuceotide	AAACGGGCCGTTCCGTGAGGCGGT
sequence-based reagent	MSMEG_0956_Top	This Study	Annealing Oligonuceotide	GGGAACCGCCTCACGGAACGGCCC
sequence-based reagent	MSMEG_0969_Bottom	This Study	Annealing Oligonuceotide	AAACGGCTGCTACCACGGCCACAGC
sequence-based reagent	MSMEG_0969_Top	This Study	Annealing Oligonuceotide	GGGAGCTGTGGCCGTGGTAGCAGCC
sequence-based reagent	MSMEG_0972_Bottom	This Study	Annealing Oligonuceotide	AAACTCGCCCTGGGCGTGAGTGTGC
sequence-based reagent	MSMEG_0972_Top	This Study	Annealing Oligonuceotide	GGGAGCACACTCACGCCCAGGGCGA
sequence-based reagent	MSMEG_0973_Bottom	This Study	Annealing Oligonuceotide	AAACACGGCCTCACCCGCGGCGTT
sequence-based reagent	MSMEG_0973_Top	This Study	Annealing Oligonuceotide	GGGAAACGCCGCGGGTGAGGCCGT
sequence-based reagent	MSMEG_0974_Bottom	This Study	Annealing Oligonuceotide	AAACGTGTTCGGCTTCGGCGTCAT
sequence-based reagent	MSMEG_0974_Top	This Study	Annealing Oligonuceotide	GGGAATGACGCCGAAGCCGAACAC
sequence-based reagent	MSMEG_0988_Bottom	This Study	Annealing Oligonuceotide	AAACCACTCGTGCTGATGCTCGCGAC
sequence-based reagent	MSMEG_0988_Top	This Study	Annealing Oligonuceotide	GGGAGTCGCGAGCATCAGCACGAGTG
sequence-based reagent	MSMEG_1075_Bottom	This Study	Annealing Oligonuceotide	AAACCTGGGCCGTGCCTACGACGC
sequence-based reagent	MSMEG_1075_Top	This Study	Annealing Oligonuceotide	GGGAGCGTCGTAGGCACGGCCCAG
sequence-based reagent	MSMEG_1109_Bottom	This Study	Annealing Oligonuceotide	AAACGACGTGTCGTCGCGGATCTT
sequence-based reagent	MSMEG_1109_Top	This Study	Annealing Oligonuceotide	GGGAAAGATCCGCGACGACACGTC
sequence-based reagent	MSMEG_1115_Bottom	This Study	Annealing Oligonuceotide	AAACCGTCGCGAGACCAAGTCGGC
sequence-based reagent	MSMEG_1115_Top	This Study	Annealing Oligonuceotide	GGGAGCCGACTTGGTCTCGCGACG
sequence-based reagent	MSMEG_1133_Bottom	This Study	Annealing Oligonuceotide	AAACGCCGGTGGCAAACGCTTCCGC
sequence-based reagent	MSMEG_1133_Top	This Study	Annealing Oligonuceotide	GGGAGCGGAAGCGTTTGCCACCGGC
sequence-based reagent	MSMEG_1344_Bottom	This Study	Annealing Oligonuceotide	AAACTCTTCCTGGTGTTCATGGTGGC
sequence-based reagent	MSMEG_1344_Top	This Study	Annealing Oligonuceotide	GGGAGCCACCATGAACACCAGGAAGA
sequence-based reagent	MSMEG_1345_Bottom	This Study	Annealing Oligonuceotide	AAACGCCGGTTACGAGAACAAGGT
sequence-based reagent	MSMEG_1345_Top	This Study	Annealing Oligonuceotide	GGGAACCTTGTTCTCGTAACCGGC
sequence-based reagent	MSMEG_1346_Bottom	This Study	Annealing Oligonuceotide	AAACGCTCGGCCAGCACGGCGTCAAC
sequence-based reagent	MSMEG_1346_Top	This Study	Annealing Oligonuceotide	GGGAGTTGACGCCGTGCTGGCCGAGC
sequence-based reagent	MSMEG_1347_Bottom	This Study	Annealing Oligonuceotide	AAACAAGAAGCAGGACGCCACCGT
sequence-based reagent	MSMEG_1347_Top	This Study	Annealing Oligonuceotide	GGGAACGGTGGCGTCCTGCTTCTT
sequence-based reagent	MSMEG_1367_A_Bottom	This Study	Annealing Oligonuceotide	AAACGAGATCATGATGGGCACGCT
sequence-based reagent	MSMEG_1367_A_Top	This Study	Annealing Oligonuceotide	GGGAAGCGTGCCCATCATGATCTC
sequence-based reagent	MSMEG_1367_B_Bottom	This Study	Annealing Oligonuceotide	AAACAAGGAGAAGCGCTACGACCT
sequence-based reagent	MSMEG_1367_B_Top	This Study	Annealing Oligonuceotide	GGGAAGGTCGTAGCGCTTCTCCTT
sequence-based reagent	MSMEG_1368_A_Bottom	This Study	Annealing Oligonuceotide	AAACGATGAACTCCGCATCGGTCT
sequence-based reagent	MSMEG_1368_A_Top	This Study	Annealing Oligonuceotide	GGGAAGACCGATGCGGAGTTCATC
sequence-based reagent	MSMEG_1368_B_Bottom	This Study	Annealing Oligonuceotide	AAACAAGGAGAAGCGCTACGACCT
sequence-based reagent	MSMEG_1368_B_Top	This Study	Annealing Oligonuceotide	GGGAGTCGGGAACGATGGTGATCTT
sequence-based reagent	MSMEG_1398_Bottom	This Study	Annealing Oligonuceotide	AAACGTGTCCGTTACAAGATCATC
sequence-based reagent	MSMEG_1398_Top	This Study	Annealing Oligonuceotide	GGGAGATGATCTTGTAACGGACAC
sequence-based reagent	MSMEG_1399_Bottom	This Study	Annealing Oligonuceotide	AAACATGCCAGCAACGGCCTCGGC
sequence-based reagent	MSMEG_1399_Top	This Study	Annealing Oligonuceotide	GGGAGCCGAGGCCGTTGCTGGCAT
sequence-based reagent	MSMEG_1401_Bottom	This Study	Annealing Oligonuceotide	AAACTGGTCGCCGCCACTGACGGC
sequence-based reagent	MSMEG_1401_Top	This Study	Annealing Oligonuceotide	GGGAGCCGTCAGTGGCGGCGACCA
sequence-based reagent	MSMEG_1436_Bottom	This Study	Annealing Oligonuceotide	AAACGACGCAACGGTGGTCTGGTGGT
sequence-based reagent	MSMEG_1436_Top	This Study	Annealing Oligonuceotide	GGGAACCACCAGACCACCGTTGCGTC
sequence-based reagent	MSMEG_1437_Bottom	This Study	Annealing Oligonuceotide	AAACCGAGCTGCCTGCCGAGCTGT
sequence-based reagent	MSMEG_1437_Top	This Study	Annealing Oligonuceotide	GGGAACAGCTCGGCAGGCAGCTCG
sequence-based reagent	MSMEG_1438_Bottom	This Study	Annealing Oligonuceotide	AAACCCCCGGTCATCTCGGAGAAGT
sequence-based reagent	MSMEG_1438_Top	This Study	Annealing Oligonuceotide	GGGAACTTCTCCGAGATGACCGGGG
sequence-based reagent	MSMEG_1439_Bottom	This Study	Annealing Oligonuceotide	AAACACTACCTGGACGGCGAGAAGC
sequence-based reagent	MSMEG_1439_Top	This Study	Annealing Oligonuceotide	GGGAGCTTCTCGCCGTCCAGGTAGT
sequence-based reagent	MSMEG_1440_Bottom	This Study	Annealing Oligonuceotide	AAACTGTTCGTCACCGAGGCGATGGT
sequence-based reagent	MSMEG_1440_Top	This Study	Annealing Oligonuceotide	GGGAACCATCGCCTCGGTGACGAACA
sequence-based reagent	MSMEG_1441_Bottom	This Study	Annealing Oligonuceotide	AAACCCGGATCCGCAAGCGCACCAGC
sequence-based reagent	MSMEG_1441_Top	This Study	Annealing Oligonuceotide	GGGAGCTGGTGCGCTTGCGGATCCGG
sequence-based reagent	MSMEG_1442_Bottom	This Study	Annealing Oligonuceotide	AAACTGCACACGCTGCGGGCCGAC
sequence-based reagent	MSMEG_1442_Top	This Study	Annealing Oligonuceotide	GGGAGTCGGCCCGCAGCGTGTGCA
sequence-based reagent	MSMEG_1443_Bottom	This Study	Annealing Oligonuceotide	AAACGCAAGGTCAAGCACCGCAAGC
sequence-based reagent	MSMEG_1443_Top	This Study	Annealing Oligonuceotide	GGGAGCTTGCGGTGCTTGACCTTGC
sequence-based reagent	MSMEG_1444_Bottom	This Study	Annealing Oligonuceotide	AAACGTGAACGTGAATTGGGCCTGGC
sequence-based reagent	MSMEG_1444_Top	This Study	Annealing Oligonuceotide	GGGAGCCAGGCCCAATTCACGTTCAC
sequence-based reagent	MSMEG_1445_Bottom	This Study	Annealing Oligonuceotide	AAACGAAGCCGCGCGGCCGTCGTAAGAC
sequence-based reagent	MSMEG_1445_Top	This Study	Annealing Oligonuceotide	GGGAGTCTTACGACGGCCGCGCGGCTTC
sequence-based reagent	MSMEG_1465_Bottom	This Study	Annealing Oligonuceotide	AAACGTGGCTCGTCGCGGCGCTAC
sequence-based reagent	MSMEG_1465_Top	This Study	Annealing Oligonuceotide	GGGAGTAGCGCCGCGACGAGCCAC
sequence-based reagent	MSMEG_1466_Bottom	This Study	Annealing Oligonuceotide	AAACCGGCAAGCCGACCCGTGTCGGAT
sequence-based reagent	MSMEG_1466_Top	This Study	Annealing Oligonuceotide	GGGAATCCGACACGGGTCGGCTTGCCG
sequence-based reagent	MSMEG_1467_Bottom	This Study	Annealing Oligonuceotide	AAACTCGGTGCGCGCGTCACGCTGC
sequence-based reagent	MSMEG_1467_Top	This Study	Annealing Oligonuceotide	GGGAGCAGCGTGACGCGCGCACCGA
sequence-based reagent	MSMEG_1469_Bottom	This Study	Annealing Oligonuceotide	AAACACACGTCTGCGCAACGCCAAT
sequence-based reagent	MSMEG_1469_Top	This Study	Annealing Oligonuceotide	GGGAATTGGCGTTGCGCAGACGTGT
sequence-based reagent	MSMEG_1470_Bottom	This Study	Annealing Oligonuceotide	AAACTCGAGGCGCCCGAGGGCATC
sequence-based reagent	MSMEG_1470_Top	This Study	Annealing Oligonuceotide	GGGAGATGCCCTCGGGCGCCTCGA
sequence-based reagent	MSMEG_1471_Bottom	This Study	Annealing Oligonuceotide	AAACGGCAGCCGGGGTCGAGACCGT
sequence-based reagent	MSMEG_1471_Top	This Study	Annealing Oligonuceotide	GGGAACGGTCTCGACCCCGGCTGCC
sequence-based reagent	MSMEG_1472_Bottom	This Study	Annealing Oligonuceotide	AAACGTGCCGCTCATCGGCAGCAC
sequence-based reagent	MSMEG_1472_Top	This Study	Annealing Oligonuceotide	GGGAGTGCTGCCGATGAGCGGCAC
sequence-based reagent	MSMEG_1474_Bottom	This Study	Annealing Oligonuceotide	AAACAGAGAAGAAGGCCAAGACCC
sequence-based reagent	MSMEG_1474_Top	This Study	Annealing Oligonuceotide	GGGAGGGTCTTGGCCTTCTTCTCT
sequence-based reagent	MSMEG_1483_Bottom	This Study	Annealing Oligonuceotide	AAACACCGGGTCGGTGCCTCGATC
sequence-based reagent	MSMEG_1483_Top	This Study	Annealing Oligonuceotide	GGGAGATCGAGGCACCGACCCGGT
sequence-based reagent	MSMEG_1512_Bottom	This Study	Annealing Oligonuceotide	AAACAGTTGATGGGCCGCGATCCC
sequence-based reagent	MSMEG_1512_Top	This Study	Annealing Oligonuceotide	GGGAGGGATCGCGGCCCATCAACT
sequence-based reagent	MSMEG_1519_Bottom	This Study	Annealing Oligonuceotide	AAACCCGAGGACCGCGTCGTGGTGGAGC
sequence-based reagent	MSMEG_1519_Top	This Study	Annealing Oligonuceotide	GGGAGCTCCACCACGACGCGGTCCTCGG
sequence-based reagent	MSMEG_1521_Bottom	This Study	Annealing Oligonuceotide	AAACCTGCGACGGGCATCGACAAGAAC
sequence-based reagent	MSMEG_1521_Top	This Study	Annealing Oligonuceotide	GGGAGTTCTTGTCGATGCCCGTCGCAG
sequence-based reagent	MSMEG_1522_Bottom	This Study	Annealing Oligonuceotide	AAACGGTCACGTGGGCTTCAAGGGC
sequence-based reagent	MSMEG_1522_Top	This Study	Annealing Oligonuceotide	GGGAGCCCTTGAAGCCCACGTGACC
sequence-based reagent	MSMEG_1523_Bottom	This Study	Annealing Oligonuceotide	AAACGCATCCTCGAGAGCCGGCTGGAC
sequence-based reagent	MSMEG_1523_Top	This Study	Annealing Oligonuceotide	GGGAGTCCAGCCGGCTCTCGAGGATGC
sequence-based reagent	MSMEG_1524_Bottom	This Study	Annealing Oligonuceotide	AAACTCTCTCAGCGTCCCACCCTGT
sequence-based reagent	MSMEG_1524_Top	This Study	Annealing Oligonuceotide	GGGAACAGGGTGGGACGCTGAGAGA
sequence-based reagent	MSMEG_1556_Bottom	This Study	Annealing Oligonuceotide	AAACACAACAAGCTCGGCCGTCAGAT
sequence-based reagent	MSMEG_1556_Top	This Study	Annealing Oligonuceotide	GGGAATCTGACGGCCGAGCTTGTTGT
sequence-based reagent	MSMEG_1557_Bottom	This Study	Annealing Oligonuceotide	AAACACCCGTGACCCGCGTGCCAT
sequence-based reagent	MSMEG_1557_Top	This Study	Annealing Oligonuceotide	GGGAATGGCACGCGGGTCACGGGT
sequence-based reagent	MSMEG_1568_Bottom	This Study	Annealing Oligonuceotide	AAACACCGAAGCACGCTGGTGATC
sequence-based reagent	MSMEG_1568_Top	This Study	Annealing Oligonuceotide	GGGAGATCACCAGCGTGCTTCGGT
sequence-based reagent	MSMEG_1582_Bottom	This Study	Annealing Oligonuceotide	AAACACACCGCCAAGGAGAAGCCGC
sequence-based reagent	MSMEG_1582_Top	This Study	Annealing Oligonuceotide	GGGAGCGGCTTCTCCTTGGCGGTGT
sequence-based reagent	MSMEG_1602_Bottom	This Study	Annealing Oligonuceotide	AAACTCGCCGTACCGGTGCCCACC
sequence-based reagent	MSMEG_1602_Top	This Study	Annealing Oligonuceotide	GGGAGGTGGGCACCGGTACGGCGA
sequence-based reagent	MSMEG_1610_Bottom	This Study	Annealing Oligonuceotide	AAACGGACCCGGACTCGGCATCCGC
sequence-based reagent	MSMEG_1610_Top	This Study	Annealing Oligonuceotide	GGGAGCGGATGCCGAGTCCGGGTCC
sequence-based reagent	MSMEG_1657_Bottom	This Study	Annealing Oligonuceotide	AAACCCATCCAGTCCGCGGTCACC
sequence-based reagent	MSMEG_1657_Top	This Study	Annealing Oligonuceotide	GGGAGGTGACCGCGGACTGGATGG
sequence-based reagent	MSMEG_1670_Bottom	This Study	Annealing Oligonuceotide	AAACAAGGGACTTCCCTTGGAGGAC
sequence-based reagent	MSMEG_1670_Top	This Study	Annealing Oligonuceotide	GGGAGTCCTCCAAGGGAAGTCCCTT
sequence-based reagent	MSMEG_1671_Bottom	This Study	Annealing Oligonuceotide	AAACTGTGGCAGGACGGCGTGTAC
sequence-based reagent	MSMEG_1671_Top	This Study	Annealing Oligonuceotide	GGGAGTACACGCCGTCCTGCCACA
sequence-based reagent	MSMEG_1672_Bottom	This Study	Annealing Oligonuceotide	AAACCTGTCATCGCCGGCCTCTTC
sequence-based reagent	MSMEG_1672_Top	This Study	Annealing Oligonuceotide	GGGAGAAGAGGCCGGCGATGACAG
sequence-based reagent	MSMEG_1807_Bottom	This Study	Annealing Oligonuceotide	AAACCCAAGCTCATCGTCACCGGT
sequence-based reagent	MSMEG_1807_Top	This Study	Annealing Oligonuceotide	GGGAACCGGTGACGATGAGCTTGG
sequence-based reagent	MSMEG_1812_Bottom	This Study	Annealing Oligonuceotide	AAACAGCGGACCCACATGCGGCGGT
sequence-based reagent	MSMEG_1812_Top	This Study	Annealing Oligonuceotide	GGGAACCGCCGCATGTGGGTCCGCT
sequence-based reagent	MSMEG_1813_Bottom	This Study	Annealing Oligonuceotide	AAACACGAAGGGTCGTTCGTCGAAC
sequence-based reagent	MSMEG_1813_Top	This Study	Annealing Oligonuceotide	GGGAGTTCGACGAACGACCCTTCGT
sequence-based reagent	MSMEG_1819_Bottom	This Study	Annealing Oligonuceotide	AAACTCGAGGAACGCGTCGCGATGC
sequence-based reagent	MSMEG_1819_Top	This Study	Annealing Oligonuceotide	GGGAGCATCGCGACGCGTTCCTCGA
sequence-based reagent	MSMEG_1826_Bottom	This Study	Annealing Oligonuceotide	AAACTCGAGGCGTCCGACCGCTGGC
sequence-based reagent	MSMEG_1826_Top	This Study	Annealing Oligonuceotide	GGGAGCCAGCGGTCGGACGCCTCGA
sequence-based reagent	MSMEG_1834_Bottom	This Study	Annealing Oligonuceotide	AAACGTCTCGGCCAGCAGCGGCTGT
sequence-based reagent	MSMEG_1834_Top	This Study	Annealing Oligonuceotide	GGGAACAGCCGCTGCTGGCCGAGAC
sequence-based reagent	MSMEG_1836_Bottom	This Study	Annealing Oligonuceotide	AAACCCGGTCGCGCGCACCGTCGAGT
sequence-based reagent	MSMEG_1836_Top	This Study	Annealing Oligonuceotide	GGGAACTCGACGGTGCGCGCGACCGG
sequence-based reagent	MSMEG_1881_Bottom	This Study	Annealing Oligonuceotide	AAACTCAACGTGATCGATCGCAAGT
sequence-based reagent	MSMEG_1881_Top	This Study	Annealing Oligonuceotide	GGGAACTTGCGATCGATCACGTTGA
sequence-based reagent	MSMEG_1890_Bottom	This Study	Annealing Oligonuceotide	AAACCCACGGTCGGCGGGTCGGTAC
sequence-based reagent	MSMEG_1890_Top	This Study	Annealing Oligonuceotide	GGGAGTACCGACCCGCCGACCGTGG
sequence-based reagent	MSMEG_2086_Bottom	This Study	Annealing Oligonuceotide	AAACGGATCCTGACCGTCAAGCAGAC
sequence-based reagent	MSMEG_2086_Top	This Study	Annealing Oligonuceotide	GGGAGTCTGCTTGACGGTCAGGATCC
sequence-based reagent	MSMEG_2365_Bottom	This Study	Annealing Oligonuceotide	AAACGCAAGACCAACATGGACGAGT
sequence-based reagent	MSMEG_2365_Top	This Study	Annealing Oligonuceotide	GGGAACTCGTCCATGTTGGTCTTGC
sequence-based reagent	MSMEG_2367_Bottom	This Study	Annealing Oligonuceotide	AAACGAGCCCGATCTGGAACCCGT
sequence-based reagent	MSMEG_2367_Top	This Study	Annealing Oligonuceotide	GGGAACGGGTTCCAGATCGGGCTC
sequence-based reagent	MSMEG_2372_Bottom	This Study	Annealing Oligonuceotide	AAACATCGCGCGGTCGGGACGTCC
sequence-based reagent	MSMEG_2372_Top	This Study	Annealing Oligonuceotide	GGGAGGACGTCCCGACCGCGCGAT
sequence-based reagent	MSMEG_2373_Bottom	This Study	Annealing Oligonuceotide	AAACCGCCGCGGCTTCAACATCCAGT
sequence-based reagent	MSMEG_2373_Top	This Study	Annealing Oligonuceotide	GGGAACTGGATGTTGAAGCCGCGGCG
sequence-based reagent	MSMEG_2374_Bottom	This Study	Annealing Oligonuceotide	AAACGGCCACGGCCTGAACATCCAC
sequence-based reagent	MSMEG_2374_Top	This Study	Annealing Oligonuceotide	GGGAGTGGATGTTCAGGCCGTGGCC
sequence-based reagent	MSMEG_2378_Bottom	This Study	Annealing Oligonuceotide	AAACCGCGCGCCGACTTCATCTCGGT
sequence-based reagent	MSMEG_2378_Top	This Study	Annealing Oligonuceotide	GGGAACCGAGATGAAGTCGGCGCGCG
sequence-based reagent	MSMEG_2379_Bottom	This Study	Annealing Oligonuceotide	AAACCTTGAAGCTGGCCGTCATCGC
sequence-based reagent	MSMEG_2379_Top	This Study	Annealing Oligonuceotide	GGGAGCGATGACGGCCAGCTTCAAG
sequence-based reagent	MSMEG_2383_Bottom	This Study	Annealing Oligonuceotide	AAACGGGAGGGCAACAAGAAGCTGT
sequence-based reagent	MSMEG_2383_Top	This Study	Annealing Oligonuceotide	GGGAACAGCTTCTTGTTGCCCTCCC
sequence-based reagent	MSMEG_2388_Bottom	This Study	Annealing Oligonuceotide	AAACCGGCCGAAGTGGCCCAAGAT
sequence-based reagent	MSMEG_2388_Top	This Study	Annealing Oligonuceotide	GGGAATCTTGGGCCACTTCGGCCG
sequence-based reagent	MSMEG_2410_Bottom	This Study	Annealing Oligonuceotide	AAACACCGCGCTGTACACACCCGAAC
sequence-based reagent	MSMEG_2410_Top	This Study	Annealing Oligonuceotide	GGGAGTTCGGGTGTGTACAGCGCGGT
sequence-based reagent	MSMEG_2411_Bottom	This Study	Annealing Oligonuceotide	AAACGTCGTCCTGGTGACGGGCGT
sequence-based reagent	MSMEG_2411_Top	This Study	Annealing Oligonuceotide	GGGAACGCCCGTCACCAGGACGAC
sequence-based reagent	MSMEG_2435_Bottom	This Study	Annealing Oligonuceotide	AAACCCCTGCTGAAGATCACCGGT
sequence-based reagent	MSMEG_2435_Top	This Study	Annealing Oligonuceotide	GGGAACCGGTGATCTTCAGCAGGG
sequence-based reagent	MSMEG_2438_Bottom	This Study	Annealing Oligonuceotide	AAACCCTACCTCGATCCGATCCGGC
sequence-based reagent	MSMEG_2438_Top	This Study	Annealing Oligonuceotide	GGGAGCCGGATCGGATCGAGGTAGG
sequence-based reagent	MSMEG_2440_Bottom	This Study	Annealing Oligonuceotide	AAACCCCGTGGTGACGTCCGCCGC
sequence-based reagent	MSMEG_2440_Top	This Study	Annealing Oligonuceotide	GGGAGCGGCGGACGTCACCACGGG
sequence-based reagent	MSMEG_2441_Bottom	This Study	Annealing Oligonuceotide	AAACTGGTGATTCCGCCGCGAATC
sequence-based reagent	MSMEG_2441_Top	This Study	Annealing Oligonuceotide	GGGAGATTCGCGGCGGAATCACCA
sequence-based reagent	MSMEG_2519_Bottom	This Study	Annealing Oligonuceotide	AAACTGCTCACGCGTGAGAAGAAC
sequence-based reagent	MSMEG_2519_Top	This Study	Annealing Oligonuceotide	GGGAGTTCTTCTCACGCGTGAGCA
sequence-based reagent	MSMEG_2540_Bottom	This Study	Annealing Oligonuceotide	AAACGGTGCCCAACTGCAGCAGCGC
sequence-based reagent	MSMEG_2540_Top	This Study	Annealing Oligonuceotide	GGGAGCGCTGCTGCAGTTGGGCACC
sequence-based reagent	MSMEG_2543_Bottom	This Study	Annealing Oligonuceotide	AAACCTGGACAAGCCGGCCTGGGT
sequence-based reagent	MSMEG_2543_Top	This Study	Annealing Oligonuceotide	GGGAACCCAGGCCGGCTTGTCCAG
sequence-based reagent	MSMEG_2578_Bottom	This Study	Annealing Oligonuceotide	AAACGACGGCCGCATCGGCTTCCC
sequence-based reagent	MSMEG_2578_Top	This Study	Annealing Oligonuceotide	GGGAGGGAAGCCGATGCGGCCGTC
sequence-based reagent	MSMEG_2613_Bottom	This Study	Annealing Oligonuceotide	AAACAACCCTGTGCCGCATGTGAGT
sequence-based reagent	MSMEG_2613_Top	This Study	Annealing Oligonuceotide	GGGAACTCACATGCGGCACAGGGTT
sequence-based reagent	MSMEG_2618_Bottom	This Study	Annealing Oligonuceotide	AAACCTCTGGCGGGTGTCCCGGTGAC
sequence-based reagent	MSMEG_2618_Top	This Study	Annealing Oligonuceotide	GGGAGTCACCGGGACACCCGCCAGAG
sequence-based reagent	MSMEG_2621_Bottom	This Study	Annealing Oligonuceotide	AAACTCCGGGCCGGCTATGTCCGT
sequence-based reagent	MSMEG_2621_Top	This Study	Annealing Oligonuceotide	GGGAACGGACATAGCCGGCCCGGA
sequence-based reagent	MSMEG_2625_Bottom	This Study	Annealing Oligonuceotide	AAACCTGGAAGTGCCCGAGATCGC
sequence-based reagent	MSMEG_2625_Top	This Study	Annealing Oligonuceotide	GGGAGCGATCTCGGGCACTTCCAG
sequence-based reagent	MSMEG_2628_Bottom	This Study	Annealing Oligonuceotide	AAACAGGGCGACAACGCCGGTACGGT
sequence-based reagent	MSMEG_2628_Top	This Study	Annealing Oligonuceotide	GGGAACCGTACCGGCGTTGTCGCCCT
sequence-based reagent	MSMEG_2653_Bottom	This Study	Annealing Oligonuceotide	AAACTCGACCTACATCCGGGCCTGC
sequence-based reagent	MSMEG_2653_Top	This Study	Annealing Oligonuceotide	GGGAGCAGGCCCGGATGTAGGTCGA
sequence-based reagent	MSMEG_2656_Bottom	This Study	Annealing Oligonuceotide	AAACCGTGAGGGCCGTCCCTCCAC
sequence-based reagent	MSMEG_2656_Top	This Study	Annealing Oligonuceotide	GGGAGTGGAGGGACGGCCCTCACG
sequence-based reagent	MSMEG_2670_Bottom	This Study	Annealing Oligonuceotide	AAACGACTGGTGACCGAGCGTGGC
sequence-based reagent	MSMEG_2670_Top	This Study	Annealing Oligonuceotide	GGGAGCCACGCTCGGTCACCAGTC
sequence-based reagent	MSMEG_2684_Bottom	This Study	Annealing Oligonuceotide	AAACTTGTGACGCCGTACTACTCGC
sequence-based reagent	MSMEG_2684_Top	This Study	Annealing Oligonuceotide	GGGAGCGAGTAGTACGGCGTCACAA
sequence-based reagent	MSMEG_2690_A_Bottom	This Study	Annealing Oligonuceotide	AAACGGCTGATGCGACTAGGCTTGC
sequence-based reagent	MSMEG_2690_A_Top	This Study	Annealing Oligonuceotide	GGGAGCAAGCCTAGTCGCATCAGCC
sequence-based reagent	MSMEG_2690_B_Bottom	This Study	Annealing Oligonuceotide	AAACCGTCCATTCCGGGCGCAGCGGT
sequence-based reagent	MSMEG_2690_B_Top	This Study	Annealing Oligonuceotide	GGGAACCGCTGCGCCCGGAATGGACG
sequence-based reagent	MSMEG_2758_Bottom	This Study	Annealing Oligonuceotide	AAACAGGACCAGCTGCAGTCCGTGC
sequence-based reagent	MSMEG_2758_Top	This Study	Annealing Oligonuceotide	GGGAGCACGGACTGCAGCTGGTCCT
sequence-based reagent	MSMEG_2776_Bottom	This Study	Annealing Oligonuceotide	AAACGACCGGTTCTTCGACGTCGGC
sequence-based reagent	MSMEG_2776_Top	This Study	Annealing Oligonuceotide	GGGAGCCGACGTCGAAGAACCGGTC
sequence-based reagent	MSMEG_2780_Bottom	This Study	Annealing Oligonuceotide	AAACGACATCGTCGTGCCGCTCAAGGC
sequence-based reagent	MSMEG_2780_Top	This Study	Annealing Oligonuceotide	GGGAGCCTTGAGCGGCACGACGATGTC
sequence-based reagent	MSMEG_2782_Bottom	This Study	Annealing Oligonuceotide	AAACACGAGGAGCGCCGCCGCATGC
sequence-based reagent	MSMEG_2782_Top	This Study	Annealing Oligonuceotide	GGGAGCATGCGGCGGCGCTCCTCGT
sequence-based reagent	MSMEG_2931_Bottom	This Study	Annealing Oligonuceotide	AAACTCGCGTGGGCGTTCGTACCGC
sequence-based reagent	MSMEG_2931_Top	This Study	Annealing Oligonuceotide	GGGAGCGGTACGAACGCCCACGCGA
sequence-based reagent	MSMEG_2934_Bottom	This Study	Annealing Oligonuceotide	AAACGGCGAGGCCACCCGGATGCC
sequence-based reagent	MSMEG_2934_Top	This Study	Annealing Oligonuceotide	GGGAGGCATCCGGGTGGCCTCGCC
sequence-based reagent	MSMEG_2935_Bottom	This Study	Annealing Oligonuceotide	AAACGGCCAGGTCGACGACGCCAC
sequence-based reagent	MSMEG_2935_Top	This Study	Annealing Oligonuceotide	GGGAGTGGCGTCGTCGACCTGGCC
sequence-based reagent	MSMEG_2961_Bottom	This Study	Annealing Oligonuceotide	AAACGCCGCCGCGGTCCTGTATGT
sequence-based reagent	MSMEG_2961_Top	This Study	Annealing Oligonuceotide	GGGAACATACAGGACCGCGGCGGC
sequence-based reagent	MSMEG_2962_Bottom	This Study	Annealing Oligonuceotide	AAACGTCCGGCTGTACACGGGCAC
sequence-based reagent	MSMEG_2962_Top	This Study	Annealing Oligonuceotide	GGGAGTGCCCGTGTACAGCCGGAC
sequence-based reagent	MSMEG_2976_Bottom	This Study	Annealing Oligonuceotide	AAACCGCTACGAGCGCCCGCAGGC
sequence-based reagent	MSMEG_2976_Top	This Study	Annealing Oligonuceotide	GGGAGCCTGCGGGCGCTCGTAGCG
sequence-based reagent	MSMEG_3003_Bottom	This Study	Annealing Oligonuceotide	AAACATGTTCGAGGCCGCCGACGAGGC
sequence-based reagent	MSMEG_3003_Top	This Study	Annealing Oligonuceotide	GGGAGCCTCGTCGGCGGCCTCGAACAT
sequence-based reagent	MSMEG_3025_Bottom	This Study	Annealing Oligonuceotide	AAACGCCGAGGCAGGCGGCCAGAT
sequence-based reagent	MSMEG_3025_Top	This Study	Annealing Oligonuceotide	GGGAATCTGGCCGCCTGCCTCGGC
sequence-based reagent	MSMEG_3030_Bottom	This Study	Annealing Oligonuceotide	AAACCGTGAGGCCCTCGGCGTCGAGGT
sequence-based reagent	MSMEG_3030_Top	This Study	Annealing Oligonuceotide	GGGAACCTCGACGCCGAGGGCCTCACG
sequence-based reagent	MSMEG_3031_Bottom	This Study	Annealing Oligonuceotide	AAACCTCTCGGCGGCGGTGCCGTGAC
sequence-based reagent	MSMEG_3031_Top	This Study	Annealing Oligonuceotide	GGGAGTCACGGCACCGCCGCCGAGAG
sequence-based reagent	MSMEG_3046_Bottom	This Study	Annealing Oligonuceotide	AAACACCGGCATGTCGGGCTACCAGGAGAC
sequence-based reagent	MSMEG_3046_Top	This Study	Annealing Oligonuceotide	GGGAGTCTCCTGGTAGCCCGACATGCCGGT
sequence-based reagent	MSMEG_3047_Bottom	This Study	Annealing Oligonuceotide	AAACGCCGCAACGGTATTCCGTGT
sequence-based reagent	MSMEG_3047_Top	This Study	Annealing Oligonuceotide	GGGAACACGGAATACCGTTGCGGC
sequence-based reagent	MSMEG_3048_Bottom	This Study	Annealing Oligonuceotide	AAACGACATCTGCGTCGCGGCGTT
sequence-based reagent	MSMEG_3048_Top	This Study	Annealing Oligonuceotide	GGGAAACGCCGCGACGCAGATGTC
sequence-based reagent	MSMEG_3051_Bottom	This Study	Annealing Oligonuceotide	AAACACCTGTACTTTTCCGTGTCC
sequence-based reagent	MSMEG_3051_Top	This Study	Annealing Oligonuceotide	GGGAGGACACGGAAAAGTACAGGT
sequence-based reagent	MSMEG_3053_Bottom	This Study	Annealing Oligonuceotide	AAACGTGAGCACCCCGCACGCCGAT
sequence-based reagent	MSMEG_3053_Top	This Study	Annealing Oligonuceotide	GGGAATCGGCGTGCGGGGTGCTCAC
sequence-based reagent	MSMEG_3054_Bottom	This Study	Annealing Oligonuceotide	AAACGCCAGGGCGAAACTCGAGCGT
sequence-based reagent	MSMEG_3054_Top	This Study	Annealing Oligonuceotide	GGGAACGCTCGAGTTTCGCCCTGGC
sequence-based reagent	MSMEG_3055_Bottom	This Study	Annealing Oligonuceotide	AAACACATCGGCTACGACTCGTCGAC
sequence-based reagent	MSMEG_3055_Top	This Study	Annealing Oligonuceotide	GGGAGTCGACGAGTCGTAGCCGATGT
sequence-based reagent	MSMEG_3061_Bottom	This Study	Annealing Oligonuceotide	AAACGGCAGGCTGGTCGACGCGTT
sequence-based reagent	MSMEG_3061_Top	This Study	Annealing Oligonuceotide	GGGAAACGCGTCGACCAGCCTGCC
sequence-based reagent	MSMEG_3066_Bottom	This Study	Annealing Oligonuceotide	AAACCCGCGGATTTCGCGCGGCTGGC
sequence-based reagent	MSMEG_3066_Top	This Study	Annealing Oligonuceotide	GGGAGCCAGCCGCGCGAAATCCGCGG
sequence-based reagent	MSMEG_3067_Bottom	This Study	Annealing Oligonuceotide	AAACTGTCGGAGCGGTGATCCTCGAT
sequence-based reagent	MSMEG_3067_Top	This Study	Annealing Oligonuceotide	GGGAATCGAGGATCACCGCTCCGACA
sequence-based reagent	MSMEG_3072_Bottom	This Study	Annealing Oligonuceotide	AAACGTGACCGCAGGCCGACGGAAT
sequence-based reagent	MSMEG_3072_Top	This Study	Annealing Oligonuceotide	GGGAATTCCGTCGGCCTGCGGTCAC
sequence-based reagent	MSMEG_3081_Bottom	This Study	Annealing Oligonuceotide	AAACGCACACGGTTCGCTTACCGAAC
sequence-based reagent	MSMEG_3081_Top	This Study	Annealing Oligonuceotide	GGGAGTTCGGTAAGCGAACCGTGTGC
sequence-based reagent	MSMEG_3084_Bottom	This Study	Annealing Oligonuceotide	AAACCCGGCTCGGTCACCGACCTGAC
sequence-based reagent	MSMEG_3084_Top	This Study	Annealing Oligonuceotide	GGGAGTCAGGTCGGTGACCGAGCCGG
sequence-based reagent	MSMEG_3103_Bottom	This Study	Annealing Oligonuceotide	AAACCCTGCGGGCATTCGAGCCTGAC
sequence-based reagent	MSMEG_3103_Top	This Study	Annealing Oligonuceotide	GGGAGTCAGGCTCGAATGCCCGCAGG
sequence-based reagent	MSMEG_3123_Bottom	This Study	Annealing Oligonuceotide	AAACCCGATCGTGTCGCCGCACAGGC
sequence-based reagent	MSMEG_3123_Top	This Study	Annealing Oligonuceotide	GGGAGCCTGTGCGGCGACACGATCGG
sequence-based reagent	MSMEG_3124_Bottom	This Study	Annealing Oligonuceotide	AAACGCTACATCCAGCCGCAGTTC
sequence-based reagent	MSMEG_3124_Top	This Study	Annealing Oligonuceotide	GGGAGAACTGCGGCTGGATGTAGC
sequence-based reagent	MSMEG_3125_Bottom	This Study	Annealing Oligonuceotide	AAACATCCTGAGCCGGGTGATGCGC
sequence-based reagent	MSMEG_3125_Top	This Study	Annealing Oligonuceotide	GGGAGCGCATCACCCGGCTCAGGAT
sequence-based reagent	MSMEG_3143_Bottom	This Study	Annealing Oligonuceotide	AAACATCGACGAGGAGACCATCAAC
sequence-based reagent	MSMEG_3143_Top	This Study	Annealing Oligonuceotide	GGGAGTTGATGGTCTCCTCGTCGAT
sequence-based reagent	MSMEG_3150_Bottom	This Study	Annealing Oligonuceotide	AAACCGACCGCGCCTTCAAAGAGGT
sequence-based reagent	MSMEG_3150_Top	This Study	Annealing Oligonuceotide	GGGAACCTCTTTGAAGGCGCGGTCG
sequence-based reagent	MSMEG_3151_Bottom	This Study	Annealing Oligonuceotide	AAACCGATCATGAATCCGGGCGGC
sequence-based reagent	MSMEG_3151_Top	This Study	Annealing Oligonuceotide	GGGAGCCGCCCGGATTCATGATCG
sequence-based reagent	MSMEG_3152_Bottom	This Study	Annealing Oligonuceotide	AAACCGTTCGGCGGGCCGGAAGCT
sequence-based reagent	MSMEG_3152_Top	This Study	Annealing Oligonuceotide	GGGAAGCTTCCGGCCCGCCGAACG
sequence-based reagent	MSMEG_3169_Bottom	This Study	Annealing Oligonuceotide	AAACGAGCGGGAGCTCGAGGTGCT
sequence-based reagent	MSMEG_3169_Top	This Study	Annealing Oligonuceotide	GGGAAGCACCTCGAGCTCCCGCTC
sequence-based reagent	MSMEG_3178_Bottom	This Study	Annealing Oligonuceotide	AAACGACTACCTCAACAAGATCGAC
sequence-based reagent	MSMEG_3178_Top	This Study	Annealing Oligonuceotide	GGGAGTCGATCTTGTTGAGGTAGTC
sequence-based reagent	MSMEG_3205_Bottom	This Study	Annealing Oligonuceotide	AAACTCAGCGTCGCACCGACACCAC
sequence-based reagent	MSMEG_3205_Top	This Study	Annealing Oligonuceotide	GGGAGTGGTGTCGGTGCGACGCTGA
sequence-based reagent	MSMEG_3206_Bottom	This Study	Annealing Oligonuceotide	AAACAGCAGCTGCTGCAGGCGTTC
sequence-based reagent	MSMEG_3206_Top	This Study	Annealing Oligonuceotide	GGGAGAACGCCTGCAGCAGCTGCT
sequence-based reagent	MSMEG_3207_Bottom	This Study	Annealing Oligonuceotide	AAACGACCACATGCTCACCTCGCT
sequence-based reagent	MSMEG_3207_Top	This Study	Annealing Oligonuceotide	GGGAAGCGAGGTGAGCATGTGGTC
sequence-based reagent	MSMEG_3208_Bottom	This Study	Annealing Oligonuceotide	AAACTTCGTGCATTCCTACGCCGC
sequence-based reagent	MSMEG_3208_Top	This Study	Annealing Oligonuceotide	GGGAGCGGCGTAGGAATGCACGAA
sequence-based reagent	MSMEG_3209_Bottom	This Study	Annealing Oligonuceotide	AAACCTGCGTGGCCGCGGCTGGGAGAC
sequence-based reagent	MSMEG_3209_Top	This Study	Annealing Oligonuceotide	GGGAGTCTCCCAGCCGCGGCCACGCAG
sequence-based reagent	MSMEG_3211_Bottom	This Study	Annealing Oligonuceotide	AAACTTCCGCGAACTGACCGTCGC
sequence-based reagent	MSMEG_3211_Top	This Study	Annealing Oligonuceotide	GGGAGCGACGGTCAGTTCGCGGAA
sequence-based reagent	MSMEG_3212_Bottom	This Study	Annealing Oligonuceotide	AAACAGGTCGACCAGGTGGGCGGC
sequence-based reagent	MSMEG_3212_Top	This Study	Annealing Oligonuceotide	GGGAGCCGCCCACCTGGTCGACCT
sequence-based reagent	MSMEG_3213_Bottom	This Study	Annealing Oligonuceotide	AAACGGTCAGACACGCGCCGAGTC
sequence-based reagent	MSMEG_3213_Top	This Study	Annealing Oligonuceotide	GGGAGACTCGGCGCGTGTCTGACC
sequence-based reagent	MSMEG_3219_Bottom	This Study	Annealing Oligonuceotide	AAACGGGATGACCGCTCTGGTCGAGGT
sequence-based reagent	MSMEG_3219_Top	This Study	Annealing Oligonuceotide	GGGAACCTCGACCAGAGCGGTCATCCC
sequence-based reagent	MSMEG_3220_Bottom	This Study	Annealing Oligonuceotide	AAACTACCTGTTGCAGGACGAGGAC
sequence-based reagent	MSMEG_3220_Top	This Study	Annealing Oligonuceotide	GGGAGTCCTCGTCCTGCAACAGGTA
sequence-based reagent	MSMEG_3221_Bottom	This Study	Annealing Oligonuceotide	AAACAGGAAGCCGACGAGTGGATGGC
sequence-based reagent	MSMEG_3221_Top	This Study	Annealing Oligonuceotide	GGGAGCCATCCACTCGTCGGCTTCCT
sequence-based reagent	MSMEG_3621_Bottom	This Study	Annealing Oligonuceotide	AAACGCGATGTGACGCACATCGAT
sequence-based reagent	MSMEG_3621_Top	This Study	Annealing Oligonuceotide	GGGAATCGATGTGCGTCACATCGC
sequence-based reagent	MSMEG_3652_Bottom	This Study	Annealing Oligonuceotide	AAACTGTTGCGCAGTCGCGGTCTGGC
sequence-based reagent	MSMEG_3652_Top	This Study	Annealing Oligonuceotide	GGGAGCCAGACCGCGACTGCGCAACA
sequence-based reagent	MSMEG_3738_Bottom	This Study	Annealing Oligonuceotide	AAACGCGGCCAACAAGGTTGACAC
sequence-based reagent	MSMEG_3738_Top	This Study	Annealing Oligonuceotide	GGGAGTGTCAACCTTGTTGGCCGC
sequence-based reagent	MSMEG_3739_Bottom	This Study	Annealing Oligonuceotide	AAACGCCGGAGAAGATGTTTCGTC
sequence-based reagent	MSMEG_3739_Top	This Study	Annealing Oligonuceotide	GGGAGACGAAACATCTTCTCCGGC
sequence-based reagent	MSMEG_3746_Bottom	This Study	Annealing Oligonuceotide	AAACGACCGCAACCTGTCGGGTTC
sequence-based reagent	MSMEG_3746_Top	This Study	Annealing Oligonuceotide	GGGAGAACCCGACAGGTTGCGGTC
sequence-based reagent	MSMEG_3758_Bottom	This Study	Annealing Oligonuceotide	AAACCGTGACATCGGCAAGTACTT
sequence-based reagent	MSMEG_3758_Top	This Study	Annealing Oligonuceotide	GGGAAAGTACTTGCCGATGTCACG
sequence-based reagent	MSMEG_3769_Bottom	This Study	Annealing Oligonuceotide	AAACTGGCGCACCATCTGCTGGCGC
sequence-based reagent	MSMEG_3769_Top	This Study	Annealing Oligonuceotide	GGGAGCGCCAGCAGATGGTGCGCCA
sequence-based reagent	MSMEG_3770_Bottom	This Study	Annealing Oligonuceotide	AAACGAGCACCTCTGGAACGCGCC
sequence-based reagent	MSMEG_3770_Top	This Study	Annealing Oligonuceotide	GGGAGGCGCGTTCCAGAGGTGCTC
sequence-based reagent	MSMEG_3772_Bottom	This Study	Annealing Oligonuceotide	AAACCCGTGCCAGGTGCTCGCCGAC
sequence-based reagent	MSMEG_3772_Top	This Study	Annealing Oligonuceotide	GGGAGTCGGCGAGCACCTGGCACGG
sequence-based reagent	MSMEG_3775_Bottom	This Study	Annealing Oligonuceotide	AAACTGAGCTCGGGTGCCAGCGAGT
sequence-based reagent	MSMEG_3775_Top	This Study	Annealing Oligonuceotide	GGGAACTCGCTGGCACCCGAGCTCA
sequence-based reagent	MSMEG_3776_Bottom	This Study	Annealing Oligonuceotide	AAACGGCTGCTGCTGGGCCATCCGGC
sequence-based reagent	MSMEG_3776_Top	This Study	Annealing Oligonuceotide	GGGAGCCGGATGGCCCAGCAGCAGCC
sequence-based reagent	MSMEG_3777_Bottom	This Study	Annealing Oligonuceotide	AAACTGCCGCCCTTGATCGTTGCGC
sequence-based reagent	MSMEG_3777_Top	This Study	Annealing Oligonuceotide	GGGAGCGCAACGATCAAGGGCGGCA
sequence-based reagent	MSMEG_3778_Bottom	This Study	Annealing Oligonuceotide	AAACTTCACCGAGCCGTCGGCCGAGGT
sequence-based reagent	MSMEG_3778_Top	This Study	Annealing Oligonuceotide	GGGAACCTCGGCCGACGGCTCGGTGAA
sequence-based reagent	MSMEG_3791_Bottom	This Study	Annealing Oligonuceotide	AAACCTGTACCGCAAGGCCAAAGAGC
sequence-based reagent	MSMEG_3791_Top	This Study	Annealing Oligonuceotide	GGGAGCTCTTTGGCCTTGCGGTACAG
sequence-based reagent	MSMEG_3793_Bottom	This Study	Annealing Oligonuceotide	AAACGAGGCCGGGTCGAAGGTCAAGGT
sequence-based reagent	MSMEG_3793_Top	This Study	Annealing Oligonuceotide	GGGAACCTTGACCTTCGACCCGGCCTC
sequence-based reagent	MSMEG_3833_Bottom	This Study	Annealing Oligonuceotide	AAACCCGCCATCGACAAGACCATC
sequence-based reagent	MSMEG_3833_Top	This Study	Annealing Oligonuceotide	GGGAGATGGTCTTGTCGATGGCGG
sequence-based reagent	MSMEG_3858_Bottom	This Study	Annealing Oligonuceotide	AAACGGGGCAGTCGCCTCGGAGCC
sequence-based reagent	MSMEG_3858_Top	This Study	Annealing Oligonuceotide	GGGAGGCTCCGAGGCGACTGCCCC
sequence-based reagent	MSMEG_3886_Bottom	This Study	Annealing Oligonuceotide	AAACTCAACCTGCTGCTCGTGTTC
sequence-based reagent	MSMEG_3886_Top	This Study	Annealing Oligonuceotide	GGGAGAACACGAGCAGCAGGTTGA
sequence-based reagent	MSMEG_4180_Bottom	This Study	Annealing Oligonuceotide	AAACCGGCCCAAGGACATCGCGAT
sequence-based reagent	MSMEG_4180_Top	This Study	Annealing Oligonuceotide	GGGAATCGCGATGTCCTTGGGCCG
sequence-based reagent	MSMEG_4185_Bottom	This Study	Annealing Oligonuceotide	AAACCCGGCCAACGCCGTCGGTGAC
sequence-based reagent	MSMEG_4185_Top	This Study	Annealing Oligonuceotide	GGGAGTCACCGACGGCGTTGGCCGG
sequence-based reagent	MSMEG_4198_Bottom	This Study	Annealing Oligonuceotide	AAACGGCGGGCGCTGTTCCTCGCAC
sequence-based reagent	MSMEG_4198_Top	This Study	Annealing Oligonuceotide	GGGAGTGCGAGGAACAGCGCCCGCC
sequence-based reagent	MSMEG_4217_A_Bottom	This Study	Annealing Oligonuceotide	AAACGATCATGGGAACCATCAACC
sequence-based reagent	MSMEG_4217_A_Top	This Study	Annealing Oligonuceotide	GGGAGGTTGATGGTTCCCATGATC
sequence-based reagent	MSMEG_4217_B_Bottom	This Study	Annealing Oligonuceotide	AAACCGCGAACAGCGACGCCAGCGGAT
sequence-based reagent	MSMEG_4217_B_Top	This Study	Annealing Oligonuceotide	GGGAATCCGCTGGCGTCGCTGTTCGCG
sequence-based reagent	MSMEG_4217_C_Bottom	This Study	Annealing Oligonuceotide	AAACCCGACGCCCAGACCCGGTCGGAGGC
sequence-based reagent	MSMEG_4217_C_Top	This Study	Annealing Oligonuceotide	GGGAGCCTCCGACCGGGTCTGGGCGTCGG
sequence-based reagent	MSMEG_4219_Bottom	This Study	Annealing Oligonuceotide	AAACGACGGAACGCCCGTGATCAT
sequence-based reagent	MSMEG_4219_Top	This Study	Annealing Oligonuceotide	GGGAATGATCACGGGCGTTCCGTC
sequence-based reagent	MSMEG_4222_A_Bottom	This Study	Annealing Oligonuceotide	AAACGGCCAACATCATCTTCGGCAC
sequence-based reagent	MSMEG_4222_A_Top	This Study	Annealing Oligonuceotide	GGGAGTGCCGAAGATGATGTTGGCC
sequence-based reagent	MSMEG_4222_B_Bottom	This Study	Annealing Oligonuceotide	AAACCGGTGGCCGGTGGCAGTGAC
sequence-based reagent	MSMEG_4222_B_Top	This Study	Annealing Oligonuceotide	GGGAGTCACTGCCACCGGCCACCG
sequence-based reagent	MSMEG_4222_C_Bottom	This Study	Annealing Oligonuceotide	AAACAGCGCCGACGAGGTGCTGCT
sequence-based reagent	MSMEG_4222_C_Top	This Study	Annealing Oligonuceotide	GGGAAGCAGCACCTCGTCGGCGCT
sequence-based reagent	MSMEG_4226_Bottom	This Study	Annealing Oligonuceotide	AAACGCGGCGAGATCCTCAGCGAAC
sequence-based reagent	MSMEG_4226_Top	This Study	Annealing Oligonuceotide	GGGAGTTCGCTGAGGATCTCGCCGC
sequence-based reagent	MSMEG_4227_Bottom	This Study	Annealing Oligonuceotide	AAACTGCTCACCGACGACTCCAAGC
sequence-based reagent	MSMEG_4227_Top	This Study	Annealing Oligonuceotide	GGGAGCTTGGAGTCGTCGGTGAGCA
sequence-based reagent	MSMEG_4228_Bottom	This Study	Annealing Oligonuceotide	AAACATGCAGCCCTCGGAGCTGGC
sequence-based reagent	MSMEG_4228_Top	This Study	Annealing Oligonuceotide	GGGAGCCAGCTCCGAGGGCTGCAT
sequence-based reagent	MSMEG_4229_Bottom	This Study	Annealing Oligonuceotide	AAACGATCAGTTCAGCGGCTACGGC
sequence-based reagent	MSMEG_4229_Top	This Study	Annealing Oligonuceotide	GGGAGCCGTAGCCGCTGAACTGATC
sequence-based reagent	MSMEG_4230_Bottom	This Study	Annealing Oligonuceotide	AAACGTCGTGGTGGTCAGCGCCTGGT
sequence-based reagent	MSMEG_4230_Top	This Study	Annealing Oligonuceotide	GGGAACCAGGCGCTGACCACCACGAC
sequence-based reagent	MSMEG_4231_Bottom	This Study	Annealing Oligonuceotide	AAACGGTTCGGAGTCCACCATGGT
sequence-based reagent	MSMEG_4231_Top	This Study	Annealing Oligonuceotide	GGGAACCATGGTGGACTCCGAACC
sequence-based reagent	MSMEG_4232_Bottom	This Study	Annealing Oligonuceotide	AAACCGCTCATGGTCGAGCGCGGT
sequence-based reagent	MSMEG_4232_Top	This Study	Annealing Oligonuceotide	GGGAACCGCGCTCGACCATGAGCG
sequence-based reagent	MSMEG_4234_Bottom	This Study	Annealing Oligonuceotide	AAACTGCGGCTGTCGTCGATCGAAC
sequence-based reagent	MSMEG_4234_Top	This Study	Annealing Oligonuceotide	GGGAGTTCGATCGACGACAGCCGCA
sequence-based reagent	MSMEG_4248_Bottom	This Study	Annealing Oligonuceotide	AAACCTCCCGCTCGTGGTCAGCCGC
sequence-based reagent	MSMEG_4248_Top	This Study	Annealing Oligonuceotide	GGGAGCGGCTGACCACGAGCGGGAG
sequence-based reagent	MSMEG_4253_Bottom	This Study	Annealing Oligonuceotide	AAACCGCGACGCGGCGGGATCCAGT
sequence-based reagent	MSMEG_4253_Top	This Study	Annealing Oligonuceotide	GGGAACTGGATCCCGCCGCGTCGCG
sequence-based reagent	MSMEG_4258_Bottom	This Study	Annealing Oligonuceotide	AAACGGCGGCTGACCACCGGCCAGAAC
sequence-based reagent	MSMEG_4258_Top	This Study	Annealing Oligonuceotide	GGGAGTTCTGGCCGGTGGTCAGCCGCC
sequence-based reagent	MSMEG_4260_Bottom	This Study	Annealing Oligonuceotide	AAACCTGGCCACCGGCTTCCACGGT
sequence-based reagent	MSMEG_4260_Top	This Study	Annealing Oligonuceotide	GGGAACCGTGGAAGCCGGTGGCCAG
sequence-based reagent	MSMEG_4261_Bottom	This Study	Annealing Oligonuceotide	AAACACCGCGGTCCCAGCCTGATC
sequence-based reagent	MSMEG_4261_Top	This Study	Annealing Oligonuceotide	GGGAGATCAGGCTGGGACCGCGGT
sequence-based reagent	MSMEG_4262_Bottom	This Study	Annealing Oligonuceotide	AAACAGGTGAGTTCCTCTACTCCC
sequence-based reagent	MSMEG_4262_Top	This Study	Annealing Oligonuceotide	GGGAGGGAGTAGAGGAACTCACCT
sequence-based reagent	MSMEG_4263_Bottom	This Study	Annealing Oligonuceotide	AAACACCGGTGCGTTCCGTCGCCC
sequence-based reagent	MSMEG_4263_Top	This Study	Annealing Oligonuceotide	GGGAGGGCGACGGAACGCACCGGT
sequence-based reagent	MSMEG_4268_Bottom	This Study	Annealing Oligonuceotide	AAACGTTCCGGAGTTCCTGTTCAAGC
sequence-based reagent	MSMEG_4268_Top	This Study	Annealing Oligonuceotide	GGGAGCTTGAACAGGAACTCCGGAAC
sequence-based reagent	MSMEG_4276_Bottom	This Study	Annealing Oligonuceotide	AAACCAACACGAATCCGGCGACCGAT
sequence-based reagent	MSMEG_4276_Top	This Study	Annealing Oligonuceotide	GGGAATCGGTCGCCGGATTCGTGTTG
sequence-based reagent	MSMEG_4283_Bottom	This Study	Annealing Oligonuceotide	AAACCCGTTCATCGCGCGTGCGGT
sequence-based reagent	MSMEG_4283_Top	This Study	Annealing Oligonuceotide	GGGAACCGCACGCGCGATGAACGG
sequence-based reagent	MSMEG_4286_Bottom	This Study	Annealing Oligonuceotide	AAACGAGGACCGCGAGGCCACGTT
sequence-based reagent	MSMEG_4286_Top	This Study	Annealing Oligonuceotide	GGGAAACGTGGCCTCGCGGTCCTC
sequence-based reagent	MSMEG_4294_Bottom	This Study	Annealing Oligonuceotide	AAACAAGCGTCTGGTCCACGGCGGC
sequence-based reagent	MSMEG_4294_Top	This Study	Annealing Oligonuceotide	GGGAGCCGCCGTGGACCAGACGCTT
sequence-based reagent	MSMEG_4325_Bottom	This Study	Annealing Oligonuceotide	AAACAATGCGGAGTCCGCCGGGAT
sequence-based reagent	MSMEG_4325_Top	This Study	Annealing Oligonuceotide	GGGAATCCCGGCGGACTCCGCATT
sequence-based reagent	MSMEG_4482_Bottom	This Study	Annealing Oligonuceotide	AAACCGCGGCGAACTGATCTACGT
sequence-based reagent	MSMEG_4482_Top	This Study	Annealing Oligonuceotide	GGGAACGTAGATCAGTTCGCCGCG
sequence-based reagent	MSMEG_4485_Bottom	This Study	Annealing Oligonuceotide	AAACACGCGTGAGTTCGAGCAGAT
sequence-based reagent	MSMEG_4485_Top	This Study	Annealing Oligonuceotide	GGGAATCTGCTCGAACTCACGCGT
sequence-based reagent	MSMEG_4493_Bottom	This Study	Annealing Oligonuceotide	AAACCTTCGTGTGTTTCGTCGGCAGGC
sequence-based reagent	MSMEG_4493_Top	This Study	Annealing Oligonuceotide	GGGAGCCTGCCGACGAAACACACGAAG
sequence-based reagent	MSMEG_4527_Bottom	This Study	Annealing Oligonuceotide	AAACGTGCATCTGGGCGGCAGCCT
sequence-based reagent	MSMEG_4527_Top	This Study	Annealing Oligonuceotide	GGGAAGGCTGCCGCCCAGATGCAC
sequence-based reagent	MSMEG_4571_Bottom	This Study	Annealing Oligonuceotide	AAACGTGGCCAACATCAAGTCGCAGAT
sequence-based reagent	MSMEG_4571_Top	This Study	Annealing Oligonuceotide	GGGAATCTGCGACTTGATGTTGGCCAC
sequence-based reagent	MSMEG_4617_Bottom	This Study	Annealing Oligonuceotide	AAACCTGTTCCAGGTGCTGCGCTT
sequence-based reagent	MSMEG_4617_Top	This Study	Annealing Oligonuceotide	GGGAAAGCGCAGCACCTGGAACAG
sequence-based reagent	MSMEG_4621_Bottom	This Study	Annealing Oligonuceotide	AAACCGGACATCGACGGCCTCTAC
sequence-based reagent	MSMEG_4621_Top	This Study	Annealing Oligonuceotide	GGGAGTAGAGGCCGTCGATGTCCG
sequence-based reagent	MSMEG_4623_Bottom	This Study	Annealing Oligonuceotide	AAACCGGCACCTCGAACGGTGTGC
sequence-based reagent	MSMEG_4623_Top	This Study	Annealing Oligonuceotide	GGGAGCACACCGTTCGAGGTGCCG
sequence-based reagent	MSMEG_4626_Bottom	This Study	Annealing Oligonuceotide	AAACACGGCGTGCACGCACTGCGGT
sequence-based reagent	MSMEG_4626_Top	This Study	Annealing Oligonuceotide	GGGAACCGCAGTGCGTGCACGCCGT
sequence-based reagent	MSMEG_4630_Bottom	This Study	Annealing Oligonuceotide	AAACCACGGCCTGATCCGCGACGAGT
sequence-based reagent	MSMEG_4630_Top	This Study	Annealing Oligonuceotide	GGGAACTCGTCGCGGATCAGGCCGTG
sequence-based reagent	MSMEG_4645_Bottom	This Study	Annealing Oligonuceotide	AAACCTGCGTGGTAAAGACACTTGGAC
sequence-based reagent	MSMEG_4645_Top	This Study	Annealing Oligonuceotide	GGGAGTCCAAGTGTCTTTACCACGCAG
sequence-based reagent	MSMEG_4646_Bottom	This Study	Annealing Oligonuceotide	AAACGCCAACCTCGGCGAGGTGCT
sequence-based reagent	MSMEG_4646_Top	This Study	Annealing Oligonuceotide	GGGAAGCACCTCGCCGAGGTTGGC
sequence-based reagent	MSMEG_4671_Bottom	This Study	Annealing Oligonuceotide	AAACAGGGTACGCAGGCGTCGGTGC
sequence-based reagent	MSMEG_4671_Top	This Study	Annealing Oligonuceotide	GGGAGCACCGACGCCTGCGTACCCT
sequence-based reagent	MSMEG_4672_Bottom	This Study	Annealing Oligonuceotide	AAACCGGCCGAAGAGGCCAAGGAGT
sequence-based reagent	MSMEG_4672_Top	This Study	Annealing Oligonuceotide	GGGAACTCCTTGGCCTCTTCGGCCG
sequence-based reagent	MSMEG_4684_Bottom	This Study	Annealing Oligonuceotide	AAACATCGCCGCGGCCGAGAAGAC
sequence-based reagent	MSMEG_4684_Top	This Study	Annealing Oligonuceotide	GGGAGTCTTCTCGGCCGCGGCGAT
sequence-based reagent	MSMEG_4700_Bottom	This Study	Annealing Oligonuceotide	AAACCCGGGTGCCATCCTCGCGGT
sequence-based reagent	MSMEG_4700_Top	This Study	Annealing Oligonuceotide	GGGAACCGCGAGGATGGCACCCGG
sequence-based reagent	MSMEG_4702_Bottom	This Study	Annealing Oligonuceotide	AAACTCGTGCGCGCGGCCGGTGAGAT
sequence-based reagent	MSMEG_4702_Top	This Study	Annealing Oligonuceotide	GGGAATCTCACCGGCCGCGCGCACGA
sequence-based reagent	MSMEG_4757_Bottom	This Study	Annealing Oligonuceotide	AAACGGCATGGTCAAGCCGGGCGAC
sequence-based reagent	MSMEG_4757_Top	This Study	Annealing Oligonuceotide	GGGAGTCGCCCGGCTTGACCATGCC
sequence-based reagent	MSMEG_4935_Bottom	This Study	Annealing Oligonuceotide	AAACCGCGGCACATCCCGCTCGTGGC
sequence-based reagent	MSMEG_4935_Top	This Study	Annealing Oligonuceotide	GGGAGCCACGAGCGGGATGTGCCGCG
sequence-based reagent	MSMEG_4936_Bottom	This Study	Annealing Oligonuceotide	AAACTCCAGGAGATGATCAACCGT
sequence-based reagent	MSMEG_4936_Top	This Study	Annealing Oligonuceotide	GGGAACGGTTGATCATCTCCTGGA
sequence-based reagent	MSMEG_4937_Bottom	This Study	Annealing Oligonuceotide	AAACAGGCCGCAGCGTCCGAGTCGGC
sequence-based reagent	MSMEG_4937_Top	This Study	Annealing Oligonuceotide	GGGAGCCGACTCGGACGCTGCGGCCT
sequence-based reagent	MSMEG_4938_Bottom	This Study	Annealing Oligonuceotide	AAACGGCACCCAGGGCCACCTGGAT
sequence-based reagent	MSMEG_4938_Top	This Study	Annealing Oligonuceotide	GGGAATCCAGGTGGCCCTGGGTGCC
sequence-based reagent	MSMEG_4941_Bottom	This Study	Annealing Oligonuceotide	AAACCGCCATCATCACGGCCGGCGC
sequence-based reagent	MSMEG_4941_Top	This Study	Annealing Oligonuceotide	GGGAGCGCCGGCCGTGATGATGGCG
sequence-based reagent	MSMEG_4942_Bottom	This Study	Annealing Oligonuceotide	AAACCTGCGGGCCAAGGTCACCTC
sequence-based reagent	MSMEG_4942_Top	This Study	Annealing Oligonuceotide	GGGAGAGGTGACCTTGGCCCGCAG
sequence-based reagent	MSMEG_4947_Bottom	This Study	Annealing Oligonuceotide	AAACGTGGGTCTGCTGCGCGACCAC
sequence-based reagent	MSMEG_4947_Top	This Study	Annealing Oligonuceotide	GGGAGTGGTCGCGCAGCAGACCCAC
sequence-based reagent	MSMEG_4954_Bottom	This Study	Annealing Oligonuceotide	AAACGGCGCCGCCCGCAACATCGAGC
sequence-based reagent	MSMEG_4954_Top	This Study	Annealing Oligonuceotide	GGGAGCTCGATGTTGCGGGCGGCGCC
sequence-based reagent	MSMEG_4955_Bottom	This Study	Annealing Oligonuceotide	AAACGGCGTTGTGGCATCGCAGCGGT
sequence-based reagent	MSMEG_4955_Top	This Study	Annealing Oligonuceotide	GGGAACCGCTGCGATGCCACAACGCC
sequence-based reagent	MSMEG_4956_Bottom	This Study	Annealing Oligonuceotide	AAACCCGCCTACCACCTGGTCGCC
sequence-based reagent	MSMEG_4956_Top	This Study	Annealing Oligonuceotide	GGGAGGCGACCAGGTGGTAGGCGG
sequence-based reagent	MSMEG_4957_Bottom	This Study	Annealing Oligonuceotide	AAACGACTGGAAGGAACGAACTCAT
sequence-based reagent	MSMEG_4957_Top	This Study	Annealing Oligonuceotide	GGGAATGAGTTCGTTCCTTCCAGTC
sequence-based reagent	MSMEG_4958_Bottom	This Study	Annealing Oligonuceotide	AAACACCCGCTGCCGCGACATCGC
sequence-based reagent	MSMEG_4958_Top	This Study	Annealing Oligonuceotide	GGGAGCGATGTCGCGGCAGCGGGT
sequence-based reagent	MSMEG_4959_Bottom	This Study	Annealing Oligonuceotide	AAACGTGTCAGCGCACCGGAGCGGAT
sequence-based reagent	MSMEG_4959_Top	This Study	Annealing Oligonuceotide	GGGAATCCGCTCCGGTGCGCTGACAC
sequence-based reagent	MSMEG_5049_Bottom	This Study	Annealing Oligonuceotide	AAACCTGCTGCGCAGGCACGGCAAGGAC
sequence-based reagent	MSMEG_5049_Top	This Study	Annealing Oligonuceotide	GGGAGTCCTTGCCGTGCCTGCGCAGCAG
sequence-based reagent	MSMEG_5103_Bottom	This Study	Annealing Oligonuceotide	AAACCGGGTCACATCGATACCGTGC
sequence-based reagent	MSMEG_5103_Top	This Study	Annealing Oligonuceotide	GGGAGCACGGTATCGATGTGACCCG
sequence-based reagent	MSMEG_5223_Bottom	This Study	Annealing Oligonuceotide	AAACCTGATGTTGTTCACCTCGGC
sequence-based reagent	MSMEG_5223_Top	This Study	Annealing Oligonuceotide	GGGAGCCGAGGTGAACAACATCAG
sequence-based reagent	MSMEG_5224_Bottom	This Study	Annealing Oligonuceotide	AAACGCGCACGGCGTCGCACCGAC
sequence-based reagent	MSMEG_5224_Top	This Study	Annealing Oligonuceotide	GGGAGTCGGTGCGACGCCGTGCGC
sequence-based reagent	MSMEG_5248_Bottom	This Study	Annealing Oligonuceotide	AAACCGCAACCTGCAGGCGCAGAT
sequence-based reagent	MSMEG_5248_Top	This Study	Annealing Oligonuceotide	GGGAATCTGCGCCTGCAGGTTGCG
sequence-based reagent	MSMEG_5249_Bottom	This Study	Annealing Oligonuceotide	AAACGCCGGCTGCCAGAACGTCGAC
sequence-based reagent	MSMEG_5249_Top	This Study	Annealing Oligonuceotide	GGGAGTCGACGTTCTGGCAGCCGGC
sequence-based reagent	MSMEG_5414_Bottom	This Study	Annealing Oligonuceotide	AAACGTGCAGCTGCCGCCGAACGC
sequence-based reagent	MSMEG_5414_Top	This Study	Annealing Oligonuceotide	GGGAGCGTTCGGCGGCAGCTGCAC
sequence-based reagent	MSMEG_5415_Bottom	This Study	Annealing Oligonuceotide	AAACGCCGGTCTGCTCGACTCCTAC
sequence-based reagent	MSMEG_5415_Top	This Study	Annealing Oligonuceotide	GGGAGTAGGAGTCGAGCAGACCGGC
sequence-based reagent	MSMEG_5435_Bottom	This Study	Annealing Oligonuceotide	AAACGACATGGGCATGGTCGGCTT
sequence-based reagent	MSMEG_5435_Top	This Study	Annealing Oligonuceotide	GGGAAAGCCGACCATGCCCATGTC
sequence-based reagent	MSMEG_5441_Bottom	This Study	Annealing Oligonuceotide	AAACACAGTGCTGTACACCACCCT
sequence-based reagent	MSMEG_5441_Top	This Study	Annealing Oligonuceotide	GGGAAGGGTGGTGTACAGCACTGT
sequence-based reagent	MSMEG_5515_Bottom	This Study	Annealing Oligonuceotide	AAACAACAACTACACGGATGCCGAC
sequence-based reagent	MSMEG_5515_Top	This Study	Annealing Oligonuceotide	GGGAGTCGGCATCCGTGTAGTTGTT
sequence-based reagent	MSMEG_5684_Bottom	This Study	Annealing Oligonuceotide	AAACCGAACTCAAGCCTCGCGACGGC
sequence-based reagent	MSMEG_5684_Top	This Study	Annealing Oligonuceotide	GGGAGCCGTCGCGAGGCTTGAGTTCG
sequence-based reagent	MSMEG_5798_Bottom	This Study	Annealing Oligonuceotide	AAACCAGGACTACATCGCCGTCGGGC
sequence-based reagent	MSMEG_5798_Top	This Study	Annealing Oligonuceotide	GGGAGCCCGACGGCGATGTAGTCCTG
sequence-based reagent	MSMEG_5800_Bottom	This Study	Annealing Oligonuceotide	AAACGTGCTGGTCTTCAAGGATCT
sequence-based reagent	MSMEG_5800_Top	This Study	Annealing Oligonuceotide	GGGAAGATCCTTGAAGACCAGCAC
sequence-based reagent	MSMEG_5824_Bottom	This Study	Annealing Oligonuceotide	AAACTTCTCCGAGTCGTCGGGCCGC
sequence-based reagent	MSMEG_5824_Top	This Study	Annealing Oligonuceotide	GGGAGCGGCCCGACGACTCGGAGAA
sequence-based reagent	MSMEG_5831_Bottom	This Study	Annealing Oligonuceotide	AAACTCCGCGCTCGACGCCATCCT
sequence-based reagent	MSMEG_5831_Top	This Study	Annealing Oligonuceotide	GGGAAGGATGGCGTCGAGCGCGGA
sequence-based reagent	MSMEG_5841_Bottom	This Study	Annealing Oligonuceotide	AAACCGGTCGAGTGCGTGGCGCGC
sequence-based reagent	MSMEG_5841_Top	This Study	Annealing Oligonuceotide	GGGAGCGCGCCACGCACTCGACCG
sequence-based reagent	MSMEG_5847_Bottom	This Study	Annealing Oligonuceotide	AAACACGGTGCTCGACGAGTTCGGT
sequence-based reagent	MSMEG_5847_Top	This Study	Annealing Oligonuceotide	GGGAACCGAACTCGTCGAGCACCGT
sequence-based reagent	MSMEG_5852_Bottom	This Study	Annealing Oligonuceotide	AAACACGCCGGCCTCGCGATCACGT
sequence-based reagent	MSMEG_5852_Top	This Study	Annealing Oligonuceotide	GGGAACGTGATCGCGAGGCCGGCGT
sequence-based reagent	MSMEG_6074_Bottom	This Study	Annealing Oligonuceotide	AAACACAAGGCCGCTGACGCCGGGC
sequence-based reagent	MSMEG_6074_Top	This Study	Annealing Oligonuceotide	GGGAGCCCGGCGTCAGCGGCCTTGT
sequence-based reagent	MSMEG_6076_Bottom	This Study	Annealing Oligonuceotide	AAACAGCACGCTCTGTCGGGGCTT
sequence-based reagent	MSMEG_6076_Top	This Study	Annealing Oligonuceotide	GGGAAAGCCCCGACAGAGCGTGCT
sequence-based reagent	MSMEG_6077_Bottom	This Study	Annealing Oligonuceotide	AAACGTGCTGCGCGCGCCGCACAC
sequence-based reagent	MSMEG_6077_Top	This Study	Annealing Oligonuceotide	GGGAGTGTGCGGCGCGCGCAGCAC
sequence-based reagent	MSMEG_6082_Bottom	This Study	Annealing Oligonuceotide	AAACGGCAGCGTGGAAAGCACTCAAGGAC
sequence-based reagent	MSMEG_6082_Top	This Study	Annealing Oligonuceotide	GGGAGTCCTTGAGTGCTTTCCACGCTGCC
sequence-based reagent	MSMEG_6091_Bottom	This Study	Annealing Oligonuceotide	AAACGGTGGACCCAAGCGCGCCGAGAC
sequence-based reagent	MSMEG_6091_Top	This Study	Annealing Oligonuceotide	GGGAGTCTCGGCGCGCTTGGGTCCACC
sequence-based reagent	MSMEG_6094_Bottom	This Study	Annealing Oligonuceotide	AAACGCGTGGCGAATTGTCGGTGC
sequence-based reagent	MSMEG_6094_Top	This Study	Annealing Oligonuceotide	GGGAGCACCGACAATTCGCCACGC
sequence-based reagent	MSMEG_6103_Bottom	This Study	Annealing Oligonuceotide	AAACGACGGTGGGAAATTCATCGAC
sequence-based reagent	MSMEG_6103_Top	This Study	Annealing Oligonuceotide	GGGAGTCGATGAATTTCCCACCGTC
sequence-based reagent	MSMEG_6104_Bottom	This Study	Annealing Oligonuceotide	AAACGTGTCGACGGACGCGTGACGGGAC
sequence-based reagent	MSMEG_6104_Top	This Study	Annealing Oligonuceotide	GGGAGTCCCGTCACGCGTCCGTCGACAC
sequence-based reagent	MSMEG_6182_Bottom	This Study	Annealing Oligonuceotide	AAACACACGTGGCTGTGGCGGTGGGT
sequence-based reagent	MSMEG_6182_Top	This Study	Annealing Oligonuceotide	GGGAACCCACCGCCACAGCCACGTGT
sequence-based reagent	MSMEG_6184_Bottom	This Study	Annealing Oligonuceotide	AAACTGGTCGTGGCGTCACCAACT
sequence-based reagent	MSMEG_6184_Top	This Study	Annealing Oligonuceotide	GGGAAGTTGGTGACGCCACGACCA
sequence-based reagent	MSMEG_6256_Bottom	This Study	Annealing Oligonuceotide	AAACGCGGGCGCCACGATGTCGCGT
sequence-based reagent	MSMEG_6256_Top	This Study	Annealing Oligonuceotide	GGGAACGCGACATCGTGGCGCCCGC
sequence-based reagent	MSMEG_6257_Bottom	This Study	Annealing Oligonuceotide	AAACGCTGCGTCGAGTACGCCCGC
sequence-based reagent	MSMEG_6257_Top	This Study	Annealing Oligonuceotide	GGGAGCGGGCGTACTCGACGCAGC
sequence-based reagent	MSMEG_6276_Bottom	This Study	Annealing Oligonuceotide	AAACTCAATCTGTCGCGTGATCAGC
sequence-based reagent	MSMEG_6276_Top	This Study	Annealing Oligonuceotide	GGGAGCTGATCACGCGACAGATTGA
sequence-based reagent	MSMEG_6277_Bottom	This Study	Annealing Oligonuceotide	AAACGTTCCGACGCACGTCCGCTC
sequence-based reagent	MSMEG_6277_Top	This Study	Annealing Oligonuceotide	GGGAGAGCGGACGTGCGTCGGAAC
sequence-based reagent	MSMEG_6285_Bottom	This Study	Annealing Oligonuceotide	AAACAGCGCATCTGCGCCGAGGAGAAC
sequence-based reagent	MSMEG_6285_Top	This Study	Annealing Oligonuceotide	GGGAGTTCTCCTCGGCGCAGATGCGCT
sequence-based reagent	MSMEG_6286_Bottom	This Study	Annealing Oligonuceotide	AAACCTGCTGCACGGAGGCCTCGAC
sequence-based reagent	MSMEG_6286_Top	This Study	Annealing Oligonuceotide	GGGAGTCGAGGCCTCCGTGCAGCAG
sequence-based reagent	MSMEG_6330_Bottom	This Study	Annealing Oligonuceotide	AAACGTGCGTGCTGGGTCTCGGCT
sequence-based reagent	MSMEG_6330_Top	This Study	Annealing Oligonuceotide	GGGAAGCCGAGACCCAGCACGCAC
sequence-based reagent	MSMEG_6366_Bottom	This Study	Annealing Oligonuceotide	AAACTCTTCGATGCCAAGACCCGC
sequence-based reagent	MSMEG_6366_Top	This Study	Annealing Oligonuceotide	GGGAGCGGGTCTTGGCATCGAAGA
sequence-based reagent	MSMEG_6367_Bottom	This Study	Annealing Oligonuceotide	AAACACCTACCGCAACCGCGGCTAC
sequence-based reagent	MSMEG_6367_Top	This Study	Annealing Oligonuceotide	GGGAGTAGCCGCGGTTGCGGTAGGT
sequence-based reagent	MSMEG_6382_Bottom	This Study	Annealing Oligonuceotide	AAACATCAAGGCAGGCCTTCACGAGT
sequence-based reagent	MSMEG_6382_Top	This Study	Annealing Oligonuceotide	GGGAACTCGTGAAGGCCTGCCTTGAT
sequence-based reagent	MSMEG_6386_Bottom	This Study	Annealing Oligonuceotide	AAACGGGCTCACGTCGCACTACGC
sequence-based reagent	MSMEG_6386_Top	This Study	Annealing Oligonuceotide	GGGAGCGTAGTGCGACGTGAGCCC
sequence-based reagent	MSMEG_6391_Bottom	This Study	Annealing Oligonuceotide	AAACAACGCCATCGTCGAGGCCGAT
sequence-based reagent	MSMEG_6391_Top	This Study	Annealing Oligonuceotide	GGGAATCGGCCTCGACGATGGCGTT
sequence-based reagent	MSMEG_6392_Bottom	This Study	Annealing Oligonuceotide	AAACGCGATGAGCGATCCGTCGAT
sequence-based reagent	MSMEG_6392_Top	This Study	Annealing Oligonuceotide	GGGAATCGACGGATCGCTCATCGC
sequence-based reagent	MSMEG_6401_Bottom	This Study	Annealing Oligonuceotide	AAACGCGTGGATCGGGACCATCGGT
sequence-based reagent	MSMEG_6401_Top	This Study	Annealing Oligonuceotide	GGGAACCGATGGTCCCGATCCACGC
sequence-based reagent	MSMEG_6403_Bottom	This Study	Annealing Oligonuceotide	AAACCCAGCACGCAGAAGTGGGAGT
sequence-based reagent	MSMEG_6403_Top	This Study	Annealing Oligonuceotide	GGGAACTCCCACTTCTGCGTGCTGG
sequence-based reagent	MSMEG_6404_Bottom	This Study	Annealing Oligonuceotide	AAACCCCGAGCGCACATATCCCAC
sequence-based reagent	MSMEG_6404_Top	This Study	Annealing Oligonuceotide	GGGAGTGGGATATGTGCGCTCGGG
sequence-based reagent	MSMEG_6413_Bottom	This Study	Annealing Oligonuceotide	AAACGCGAGAATCCCGACATCGTC
sequence-based reagent	MSMEG_6413_Top	This Study	Annealing Oligonuceotide	GGGAGACGATGTCGGGATTCTCGC
sequence-based reagent	MSMEG_6520_Bottom	This Study	Annealing Oligonuceotide	AAACCTCGCCAGCGGGCAGCTCAGC
sequence-based reagent	MSMEG_6520_Top	This Study	Annealing Oligonuceotide	GGGAGCTGAGCTGCCCGCTGGCGAG
sequence-based reagent	MSMEG_6892_Bottom	This Study	Annealing Oligonuceotide	AAACCGTCCCGCCCACCAGAGCGT
sequence-based reagent	MSMEG_6892_Top	This Study	Annealing Oligonuceotide	GGGAACGCTCTGGTGGGCGGGACG
sequence-based reagent	MSMEG_6895_Bottom	This Study	Annealing Oligonuceotide	AAACGCACCTACATCAGCGAGCGC
sequence-based reagent	MSMEG_6895_Top	This Study	Annealing Oligonuceotide	GGGAGCGCTCGCTGATGTAGGTGC
sequence-based reagent	MSMEG_6896_Bottom	This Study	Annealing Oligonuceotide	AAACCGGTGCAACATCTGGCGTGAGGC
sequence-based reagent	MSMEG_6896_Top	This Study	Annealing Oligonuceotide	GGGAGCCTCACGCCAGATGTTGCACCG
sequence-based reagent	MSMEG_6900_Bottom	This Study	Annealing Oligonuceotide	AAACGGCGTCGAGCACACGCTGAGC
sequence-based reagent	MSMEG_6900_Top	This Study	Annealing Oligonuceotide	GGGAGCTCAGCGTGTGCTCGACGCC
sequence-based reagent	MSMEG_6904_Bottom	This Study	Annealing Oligonuceotide	AAACAACATGCTCGAGCGTTCGCGT
sequence-based reagent	MSMEG_6904_Top	This Study	Annealing Oligonuceotide	GGGAACGCGAACGCTCGAGCATGTT
sequence-based reagent	MSMEG_6917_Bottom	This Study	Annealing Oligonuceotide	AAACGACGGCATGGATGTGGCGTC
sequence-based reagent	MSMEG_6917_Top	This Study	Annealing Oligonuceotide	GGGAGACGCCACATCCATGCCGTC
sequence-based reagent	MSMEG_6926_Bottom	This Study	Annealing Oligonuceotide	AAACGCGGCTGGTCCGACGCGCTGT
sequence-based reagent	MSMEG_6926_Top	This Study	Annealing Oligonuceotide	GGGAACAGCGCGTCGGACCAGCCGC
sequence-based reagent	MSMEG_6927_Bottom	This Study	Annealing Oligonuceotide	AAACCACCTCGTCCGCGCCGACGC
sequence-based reagent	MSMEG_6927_Top	This Study	Annealing Oligonuceotide	GGGAGCGTCGGCGCGGACGAGGTG
sequence-based reagent	MSMEG_6928_Bottom	This Study	Annealing Oligonuceotide	AAACATCACGCTGTCGGCCGGTGC
sequence-based reagent	MSMEG_6928_Top	This Study	Annealing Oligonuceotide	GGGAGCACCGGCCGACAGCGTGAT
sequence-based reagent	MSMEG_6929_Bottom	This Study	Annealing Oligonuceotide	AAACAATCGGTCGAACAGACGCCC
sequence-based reagent	MSMEG_6929_Top	This Study	Annealing Oligonuceotide	GGGAGGGCGTCTGTTCGACCGATT
sequence-based reagent	MSMEG_6942_Bottom	This Study	Annealing Oligonuceotide	AAACTCGCCGTGATCATGTACTGGC
sequence-based reagent	MSMEG_6942_Top	This Study	Annealing Oligonuceotide	GGGAGCCAGTACATGATCACGGCGA
sequence-based reagent	MSMEG_6946_Bottom	This Study	Annealing Oligonuceotide	AAACCCGGCGTAGCAAGGGCCGTC
sequence-based reagent	MSMEG_6946_Top	This Study	Annealing Oligonuceotide	GGGAGACGGCCCTTGCTACGCCGG
sequence-based reagent	MSMEG_6947_Bottom	This Study	Annealing Oligonuceotide	AAACGCAAGAAGGCGCAGATGGAT
sequence-based reagent	MSMEG_6947_Top	This Study	Annealing Oligonuceotide	GGGAATCCATCTGCGCCTTCTTGC
sequence-based reagent	Seq_F	This Study	PCR Primer	CTGGTCCACCTACAACAAAG
sequence-based reagent	Seq_R	This Study	PCR Primer	CCCTGATTCTGTGGATAACC

## Sheet: recombinant DNA reagent
Reagent type (species) or resource	Designation	Source or refrence	Identifiers	Additional Information
recombinant DNA reagent	plJR962::MSMEG_0001	This Paper		CRISPRi Plasmid Targeting MSMEG_0001
recombinant DNA reagent	plJR962::MSMEG_0005	This Paper		CRISPRi Plasmid Targeting MSMEG_0005
recombinant DNA reagent	plJR962::MSMEG_0006	This Paper		CRISPRi Plasmid Targeting MSMEG_0006
recombinant DNA reagent	plJR962::MSMEG_0028	This Paper		CRISPRi Plasmid Targeting MSMEG_0028
recombinant DNA reagent	plJR962::MSMEG_0030	This Paper		CRISPRi Plasmid Targeting MSMEG_0030
recombinant DNA reagent	plJR962::MSMEG_0250	This Paper		CRISPRi Plasmid Targeting MSMEG_0250
recombinant DNA reagent	plJR962::MSMEG_0317	This Paper		CRISPRi Plasmid Targeting MSMEG_0317
recombinant DNA reagent	plJR962::MSMEG_0384	This Paper		CRISPRi Plasmid Targeting MSMEG_0384
recombinant DNA reagent	plJR962::MSMEG_0690	This Paper		CRISPRi Plasmid Targeting MSMEG_0690
recombinant DNA reagent	plJR962::MSMEG_0759	This Paper		CRISPRi Plasmid Targeting MSMEG_0759
recombinant DNA reagent	plJR962::MSMEG_0880	This Paper		CRISPRi Plasmid Targeting MSMEG_0880
recombinant DNA reagent	plJR962::MSMEG_0903	This Paper		CRISPRi Plasmid Targeting MSMEG_0903
recombinant DNA reagent	plJR962::MSMEG_0949	This Paper		CRISPRi Plasmid Targeting MSMEG_0949
recombinant DNA reagent	plJR962::MSMEG_0952	This Paper		CRISPRi Plasmid Targeting MSMEG_0952
recombinant DNA reagent	plJR962::MSMEG_0953	This Paper		CRISPRi Plasmid Targeting MSMEG_0953
recombinant DNA reagent	plJR962::MSMEG_0954	This Paper		CRISPRi Plasmid Targeting MSMEG_0954
recombinant DNA reagent	plJR962::MSMEG_0956	This Paper		CRISPRi Plasmid Targeting MSMEG_0956
recombinant DNA reagent	plJR962::MSMEG_0969	This Paper		CRISPRi Plasmid Targeting MSMEG_0969
recombinant DNA reagent	plJR962::MSMEG_0972	This Paper		CRISPRi Plasmid Targeting MSMEG_0972
recombinant DNA reagent	plJR962::MSMEG_0973	This Paper		CRISPRi Plasmid Targeting MSMEG_0973
recombinant DNA reagent	plJR962::MSMEG_0974	This Paper		CRISPRi Plasmid Targeting MSMEG_0974
recombinant DNA reagent	plJR962::MSMEG_0988	This Paper		CRISPRi Plasmid Targeting MSMEG_0988
recombinant DNA reagent	plJR962::MSMEG_1075	This Paper		CRISPRi Plasmid Targeting MSMEG_1075
recombinant DNA reagent	plJR962::MSMEG_1109	This Paper		CRISPRi Plasmid Targeting MSMEG_1109
recombinant DNA reagent	plJR962::MSMEG_1115	This Paper		CRISPRi Plasmid Targeting MSMEG_1115
recombinant DNA reagent	plJR962::MSMEG_1344	This Paper		CRISPRi Plasmid Targeting MSMEG_1344
recombinant DNA reagent	plJR962::MSMEG_1345	This Paper		CRISPRi Plasmid Targeting MSMEG_1345
recombinant DNA reagent	plJR962::MSMEG_1346	This Paper		CRISPRi Plasmid Targeting MSMEG_1346
recombinant DNA reagent	plJR962::MSMEG_1347	This Paper		CRISPRi Plasmid Targeting MSMEG_1347
recombinant DNA reagent	plJR962::MSMEG_1367_A	This Paper		CRISPRi Plasmid Targeting MSMEG_1367
recombinant DNA reagent	plJR962::MSMEG_1367_B	This Paper		CRISPRi Plasmid Targeting MSMEG_1367
recombinant DNA reagent	plJR962::MSMEG_1368_A	This Paper		CRISPRi Plasmid Targeting MSMEG_1368
recombinant DNA reagent	plJR962::MSMEG_1368_B	This Paper		CRISPRi Plasmid Targeting MSMEG_1368
recombinant DNA reagent	plJR962::MSMEG_1398	This Paper		CRISPRi Plasmid Targeting MSMEG_1398
recombinant DNA reagent	plJR962::MSMEG_1399	This Paper		CRISPRi Plasmid Targeting MSMEG_1399
recombinant DNA reagent	plJR962::MSMEG_1401	This Paper		CRISPRi Plasmid Targeting MSMEG_1401
recombinant DNA reagent	plJR962::MSMEG_1436	This Paper		CRISPRi Plasmid Targeting MSMEG_1436
recombinant DNA reagent	plJR962::MSMEG_1437	This Paper		CRISPRi Plasmid Targeting MSMEG_1437
recombinant DNA reagent	plJR962::MSMEG_1438	This Paper		CRISPRi Plasmid Targeting MSMEG_1438
recombinant DNA reagent	plJR962::MSMEG_1439	This Paper		CRISPRi Plasmid Targeting MSMEG_1439
recombinant DNA reagent	plJR962::MSMEG_1440	This Paper		CRISPRi Plasmid Targeting MSMEG_1440
recombinant DNA reagent	plJR962::MSMEG_1441	This Paper		CRISPRi Plasmid Targeting MSMEG_1441
recombinant DNA reagent	plJR962::MSMEG_1442	This Paper		CRISPRi Plasmid Targeting MSMEG_1442
recombinant DNA reagent	plJR962::MSMEG_1443	This Paper		CRISPRi Plasmid Targeting MSMEG_1443
recombinant DNA reagent	plJR962::MSMEG_1444	This Paper		CRISPRi Plasmid Targeting MSMEG_1444
recombinant DNA reagent	plJR962::MSMEG_1445	This Paper		CRISPRi Plasmid Targeting MSMEG_1445
recombinant DNA reagent	plJR962::MSMEG_1465	This Paper		CRISPRi Plasmid Targeting MSMEG_1465
recombinant DNA reagent	plJR962::MSMEG_1467	This Paper		CRISPRi Plasmid Targeting MSMEG_1467
recombinant DNA reagent	plJR962::MSMEG_1469	This Paper		CRISPRi Plasmid Targeting MSMEG_1469
recombinant DNA reagent	plJR962::MSMEG_1470	This Paper		CRISPRi Plasmid Targeting MSMEG_1470
recombinant DNA reagent	plJR962::MSMEG_1471	This Paper		CRISPRi Plasmid Targeting MSMEG_1471
recombinant DNA reagent	plJR962::MSMEG_1472	This Paper		CRISPRi Plasmid Targeting MSMEG_1472
recombinant DNA reagent	plJR962::MSMEG_1474	This Paper		CRISPRi Plasmid Targeting MSMEG_1474
recombinant DNA reagent	plJR962::MSMEG_1483	This Paper		CRISPRi Plasmid Targeting MSMEG_1483
recombinant DNA reagent	plJR962::MSMEG_1512	This Paper		CRISPRi Plasmid Targeting MSMEG_1512
recombinant DNA reagent	plJR962::MSMEG_1519	This Paper		CRISPRi Plasmid Targeting MSMEG_1519
recombinant DNA reagent	plJR962::MSMEG_1521	This Paper		CRISPRi Plasmid Targeting MSMEG_1521
recombinant DNA reagent	plJR962::MSMEG_1522	This Paper		CRISPRi Plasmid Targeting MSMEG_1522
recombinant DNA reagent	plJR962::MSMEG_1523	This Paper		CRISPRi Plasmid Targeting MSMEG_1523
recombinant DNA reagent	plJR962::MSMEG_1524	This Paper		CRISPRi Plasmid Targeting MSMEG_1524
recombinant DNA reagent	plJR962::MSMEG_1556	This Paper		CRISPRi Plasmid Targeting MSMEG_1556
recombinant DNA reagent	plJR962::MSMEG_1557	This Paper		CRISPRi Plasmid Targeting MSMEG_1557
recombinant DNA reagent	plJR962::MSMEG_1568	This Paper		CRISPRi Plasmid Targeting MSMEG_1568
recombinant DNA reagent	plJR962::MSMEG_1582	This Paper		CRISPRi Plasmid Targeting MSMEG_1582
recombinant DNA reagent	plJR962::MSMEG_1602	This Paper		CRISPRi Plasmid Targeting MSMEG_1602
recombinant DNA reagent	plJR962::MSMEG_1657	This Paper		CRISPRi Plasmid Targeting MSMEG_1657
recombinant DNA reagent	plJR962::MSMEG_1670	This Paper		CRISPRi Plasmid Targeting MSMEG_1670
recombinant DNA reagent	plJR962::MSMEG_1671	This Paper		CRISPRi Plasmid Targeting MSMEG_1671
recombinant DNA reagent	plJR962::MSMEG_1807	This Paper		CRISPRi Plasmid Targeting MSMEG_1807
recombinant DNA reagent	plJR962::MSMEG_1812	This Paper		CRISPRi Plasmid Targeting MSMEG_1812
recombinant DNA reagent	plJR962::MSMEG_1813	This Paper		CRISPRi Plasmid Targeting MSMEG_1813
recombinant DNA reagent	plJR962::MSMEG_1819	This Paper		CRISPRi Plasmid Targeting MSMEG_1819
recombinant DNA reagent	plJR962::MSMEG_1826	This Paper		CRISPRi Plasmid Targeting MSMEG_1826
recombinant DNA reagent	plJR962::MSMEG_1834	This Paper		CRISPRi Plasmid Targeting MSMEG_1834
recombinant DNA reagent	plJR962::MSMEG_1836	This Paper		CRISPRi Plasmid Targeting MSMEG_1836
recombinant DNA reagent	plJR962::MSMEG_1890	This Paper		CRISPRi Plasmid Targeting MSMEG_1890
recombinant DNA reagent	plJR962::MSMEG_2086	This Paper		CRISPRi Plasmid Targeting MSMEG_2086
recombinant DNA reagent	plJR962::MSMEG_2365	This Paper		CRISPRi Plasmid Targeting MSMEG_2365
recombinant DNA reagent	plJR962::MSMEG_2367	This Paper		CRISPRi Plasmid Targeting MSMEG_2367
recombinant DNA reagent	plJR962::MSMEG_2372	This Paper		CRISPRi Plasmid Targeting MSMEG_2372
recombinant DNA reagent	plJR962::MSMEG_2373	This Paper		CRISPRi Plasmid Targeting MSMEG_2373
recombinant DNA reagent	plJR962::MSMEG_2374	This Paper		CRISPRi Plasmid Targeting MSMEG_2374
recombinant DNA reagent	plJR962::MSMEG_2378	This Paper		CRISPRi Plasmid Targeting MSMEG_2378
recombinant DNA reagent	plJR962::MSMEG_2379	This Paper		CRISPRi Plasmid Targeting MSMEG_2379
recombinant DNA reagent	plJR962::MSMEG_2383	This Paper		CRISPRi Plasmid Targeting MSMEG_2383
recombinant DNA reagent	plJR962::MSMEG_2388	This Paper		CRISPRi Plasmid Targeting MSMEG_2388
recombinant DNA reagent	plJR962::MSMEG_2410	This Paper		CRISPRi Plasmid Targeting MSMEG_2410
recombinant DNA reagent	plJR962::MSMEG_2411	This Paper		CRISPRi Plasmid Targeting MSMEG_2411
recombinant DNA reagent	plJR962::MSMEG_2435	This Paper		CRISPRi Plasmid Targeting MSMEG_2435
recombinant DNA reagent	plJR962::MSMEG_2438	This Paper		CRISPRi Plasmid Targeting MSMEG_2438
recombinant DNA reagent	plJR962::MSMEG_2440	This Paper		CRISPRi Plasmid Targeting MSMEG_2440
recombinant DNA reagent	plJR962::MSMEG_2441	This Paper		CRISPRi Plasmid Targeting MSMEG_2441
recombinant DNA reagent	plJR962::MSMEG_2540	This Paper		CRISPRi Plasmid Targeting MSMEG_2540
recombinant DNA reagent	plJR962::MSMEG_2578	This Paper		CRISPRi Plasmid Targeting MSMEG_2578
recombinant DNA reagent	plJR962::MSMEG_2613	This Paper		CRISPRi Plasmid Targeting MSMEG_2613
recombinant DNA reagent	plJR962::MSMEG_2618	This Paper		CRISPRi Plasmid Targeting MSMEG_2618
recombinant DNA reagent	plJR962::MSMEG_2621	This Paper		CRISPRi Plasmid Targeting MSMEG_2621
recombinant DNA reagent	plJR962::MSMEG_2625	This Paper		CRISPRi Plasmid Targeting MSMEG_2625
recombinant DNA reagent	plJR962::MSMEG_2628	This Paper		CRISPRi Plasmid Targeting MSMEG_2628
recombinant DNA reagent	plJR962::MSMEG_2653	This Paper		CRISPRi Plasmid Targeting MSMEG_2653
recombinant DNA reagent	plJR962::MSMEG_2656	This Paper		CRISPRi Plasmid Targeting MSMEG_2656
recombinant DNA reagent	plJR962::MSMEG_2670	This Paper		CRISPRi Plasmid Targeting MSMEG_2670
recombinant DNA reagent	plJR962::MSMEG_2684	This Paper		CRISPRi Plasmid Targeting MSMEG_2684
recombinant DNA reagent	plJR962::MSMEG_2690_A	This Paper		CRISPRi Plasmid Targeting MSMEG_2690
recombinant DNA reagent	plJR962::MSMEG_2690_B	This Paper		CRISPRi Plasmid Targeting MSMEG_2690
recombinant DNA reagent	plJR962::MSMEG_2758	This Paper		CRISPRi Plasmid Targeting MSMEG_2758
recombinant DNA reagent	plJR962::MSMEG_2776	This Paper		CRISPRi Plasmid Targeting MSMEG_2776
recombinant DNA reagent	plJR962::MSMEG_2780	This Paper		CRISPRi Plasmid Targeting MSMEG_2780
recombinant DNA reagent	plJR962::MSMEG_2782	This Paper		CRISPRi Plasmid Targeting MSMEG_2782
recombinant DNA reagent	plJR962::MSMEG_2931	This Paper		CRISPRi Plasmid Targeting MSMEG_2931
recombinant DNA reagent	plJR962::MSMEG_2934	This Paper		CRISPRi Plasmid Targeting MSMEG_2934
recombinant DNA reagent	plJR962::MSMEG_2935	This Paper		CRISPRi Plasmid Targeting MSMEG_2935
recombinant DNA reagent	plJR962::MSMEG_2961	This Paper		CRISPRi Plasmid Targeting MSMEG_2961
recombinant DNA reagent	plJR962::MSMEG_2962	This Paper		CRISPRi Plasmid Targeting MSMEG_2962
recombinant DNA reagent	plJR962::MSMEG_2976	This Paper		CRISPRi Plasmid Targeting MSMEG_2976
recombinant DNA reagent	plJR962::MSMEG_3003	This Paper		CRISPRi Plasmid Targeting MSMEG_3003
recombinant DNA reagent	plJR962::MSMEG_3025	This Paper		CRISPRi Plasmid Targeting MSMEG_3025
recombinant DNA reagent	plJR962::MSMEG_3030	This Paper		CRISPRi Plasmid Targeting MSMEG_3030
recombinant DNA reagent	plJR962::MSMEG_3031	This Paper		CRISPRi Plasmid Targeting MSMEG_3031
recombinant DNA reagent	plJR962::MSMEG_3046	This Paper		CRISPRi Plasmid Targeting MSMEG_3046
recombinant DNA reagent	plJR962::MSMEG_3047	This Paper		CRISPRi Plasmid Targeting MSMEG_3047
recombinant DNA reagent	plJR962::MSMEG_3048	This Paper		CRISPRi Plasmid Targeting MSMEG_3048
recombinant DNA reagent	plJR962::MSMEG_3051	This Paper		CRISPRi Plasmid Targeting MSMEG_3051
recombinant DNA reagent	plJR962::MSMEG_3053	This Paper		CRISPRi Plasmid Targeting MSMEG_3053
recombinant DNA reagent	plJR962::MSMEG_3054	This Paper		CRISPRi Plasmid Targeting MSMEG_3054
recombinant DNA reagent	plJR962::MSMEG_3055	This Paper		CRISPRi Plasmid Targeting MSMEG_3055
recombinant DNA reagent	plJR962::MSMEG_3061	This Paper		CRISPRi Plasmid Targeting MSMEG_3061
recombinant DNA reagent	plJR962::MSMEG_3066	This Paper		CRISPRi Plasmid Targeting MSMEG_3066
recombinant DNA reagent	plJR962::MSMEG_3072	This Paper		CRISPRi Plasmid Targeting MSMEG_3072
recombinant DNA reagent	plJR962::MSMEG_3081	This Paper		CRISPRi Plasmid Targeting MSMEG_3081
recombinant DNA reagent	plJR962::MSMEG_3084	This Paper		CRISPRi Plasmid Targeting MSMEG_3084
recombinant DNA reagent	plJR962::MSMEG_3103	This Paper		CRISPRi Plasmid Targeting MSMEG_3103
recombinant DNA reagent	plJR962::MSMEG_3123	This Paper		CRISPRi Plasmid Targeting MSMEG_3123
recombinant DNA reagent	plJR962::MSMEG_3124	This Paper		CRISPRi Plasmid Targeting MSMEG_3124
recombinant DNA reagent	plJR962::MSMEG_3125	This Paper		CRISPRi Plasmid Targeting MSMEG_3125
recombinant DNA reagent	plJR962::MSMEG_3143	This Paper		CRISPRi Plasmid Targeting MSMEG_3143
recombinant DNA reagent	plJR962::MSMEG_3150	This Paper		CRISPRi Plasmid Targeting MSMEG_3150
recombinant DNA reagent	plJR962::MSMEG_3151	This Paper		CRISPRi Plasmid Targeting MSMEG_3151
recombinant DNA reagent	plJR962::MSMEG_3152	This Paper		CRISPRi Plasmid Targeting MSMEG_3152
recombinant DNA reagent	plJR962::MSMEG_3169	This Paper		CRISPRi Plasmid Targeting MSMEG_3169
recombinant DNA reagent	plJR962::MSMEG_3178	This Paper		CRISPRi Plasmid Targeting MSMEG_3178
recombinant DNA reagent	plJR962::MSMEG_3206	This Paper		CRISPRi Plasmid Targeting MSMEG_3206
recombinant DNA reagent	plJR962::MSMEG_3207	This Paper		CRISPRi Plasmid Targeting MSMEG_3207
recombinant DNA reagent	plJR962::MSMEG_3208	This Paper		CRISPRi Plasmid Targeting MSMEG_3208
recombinant DNA reagent	plJR962::MSMEG_3209	This Paper		CRISPRi Plasmid Targeting MSMEG_3209
recombinant DNA reagent	plJR962::MSMEG_3211	This Paper		CRISPRi Plasmid Targeting MSMEG_3211
recombinant DNA reagent	plJR962::MSMEG_3213	This Paper		CRISPRi Plasmid Targeting MSMEG_3213
recombinant DNA reagent	plJR962::MSMEG_3219	This Paper		CRISPRi Plasmid Targeting MSMEG_3219
recombinant DNA reagent	plJR962::MSMEG_3220	This Paper		CRISPRi Plasmid Targeting MSMEG_3220
recombinant DNA reagent	plJR962::MSMEG_3221	This Paper		CRISPRi Plasmid Targeting MSMEG_3221
recombinant DNA reagent	plJR962::MSMEG_3621	This Paper		CRISPRi Plasmid Targeting MSMEG_3621
recombinant DNA reagent	plJR962::MSMEG_3652	This Paper		CRISPRi Plasmid Targeting MSMEG_3652
recombinant DNA reagent	plJR962::MSMEG_3738	This Paper		CRISPRi Plasmid Targeting MSMEG_3738
recombinant DNA reagent	plJR962::MSMEG_3739	This Paper		CRISPRi Plasmid Targeting MSMEG_3739
recombinant DNA reagent	plJR962::MSMEG_3746	This Paper		CRISPRi Plasmid Targeting MSMEG_3746
recombinant DNA reagent	plJR962::MSMEG_3758	This Paper		CRISPRi Plasmid Targeting MSMEG_3758
recombinant DNA reagent	plJR962::MSMEG_3769	This Paper		CRISPRi Plasmid Targeting MSMEG_3769
recombinant DNA reagent	plJR962::MSMEG_3770	This Paper		CRISPRi Plasmid Targeting MSMEG_3770
recombinant DNA reagent	plJR962::MSMEG_3772	This Paper		CRISPRi Plasmid Targeting MSMEG_3772
recombinant DNA reagent	plJR962::MSMEG_3775	This Paper		CRISPRi Plasmid Targeting MSMEG_3775
recombinant DNA reagent	plJR962::MSMEG_3776	This Paper		CRISPRi Plasmid Targeting MSMEG_3776
recombinant DNA reagent	plJR962::MSMEG_3777	This Paper		CRISPRi Plasmid Targeting MSMEG_3777
recombinant DNA reagent	plJR962::MSMEG_3778	This Paper		CRISPRi Plasmid Targeting MSMEG_3778
recombinant DNA reagent	plJR962::MSMEG_3791	This Paper		CRISPRi Plasmid Targeting MSMEG_3791
recombinant DNA reagent	plJR962::MSMEG_3793	This Paper		CRISPRi Plasmid Targeting MSMEG_3793
recombinant DNA reagent	plJR962::MSMEG_3833	This Paper		CRISPRi Plasmid Targeting MSMEG_3833
recombinant DNA reagent	plJR962::MSMEG_3858	This Paper		CRISPRi Plasmid Targeting MSMEG_3858
recombinant DNA reagent	plJR962::MSMEG_3886	This Paper		CRISPRi Plasmid Targeting MSMEG_3886
recombinant DNA reagent	plJR962::MSMEG_4180	This Paper		CRISPRi Plasmid Targeting MSMEG_4180
recombinant DNA reagent	plJR962::MSMEG_4185	This Paper		CRISPRi Plasmid Targeting MSMEG_4185
recombinant DNA reagent	plJR962::MSMEG_4198	This Paper		CRISPRi Plasmid Targeting MSMEG_4198
recombinant DNA reagent	plJR962::MSMEG_4217_A	This Paper		CRISPRi Plasmid Targeting MSMEG_4217
recombinant DNA reagent	plJR962::MSMEG_4217_B	This Paper		CRISPRi Plasmid Targeting MSMEG_4217
recombinant DNA reagent	plJR962::MSMEG_4217_C	This Paper		CRISPRi Plasmid Targeting MSMEG_4217
recombinant DNA reagent	plJR962::MSMEG_4219	This Paper		CRISPRi Plasmid Targeting MSMEG_4219
recombinant DNA reagent	plJR962::MSMEG_4222_A	This Paper		CRISPRi Plasmid Targeting MSMEG_4222
recombinant DNA reagent	plJR962::MSMEG_4222_B	This Paper		CRISPRi Plasmid Targeting MSMEG_4222
recombinant DNA reagent	plJR962::MSMEG_4222_C	This Paper		CRISPRi Plasmid Targeting MSMEG_4222
recombinant DNA reagent	plJR962::MSMEG_4226	This Paper		CRISPRi Plasmid Targeting MSMEG_4226
recombinant DNA reagent	plJR962::MSMEG_4227	This Paper		CRISPRi Plasmid Targeting MSMEG_4227
recombinant DNA reagent	plJR962::MSMEG_4228	This Paper		CRISPRi Plasmid Targeting MSMEG_4228
recombinant DNA reagent	plJR962::MSMEG_4229	This Paper		CRISPRi Plasmid Targeting MSMEG_4229
recombinant DNA reagent	plJR962::MSMEG_4230	This Paper		CRISPRi Plasmid Targeting MSMEG_4230
recombinant DNA reagent	plJR962::MSMEG_4231	This Paper		CRISPRi Plasmid Targeting MSMEG_4231
recombinant DNA reagent	plJR962::MSMEG_4232	This Paper		CRISPRi Plasmid Targeting MSMEG_4232
recombinant DNA reagent	plJR962::MSMEG_4234	This Paper		CRISPRi Plasmid Targeting MSMEG_4234
recombinant DNA reagent	plJR962::MSMEG_4248	This Paper		CRISPRi Plasmid Targeting MSMEG_4248
recombinant DNA reagent	plJR962::MSMEG_4253	This Paper		CRISPRi Plasmid Targeting MSMEG_4253
recombinant DNA reagent	plJR962::MSMEG_4258	This Paper		CRISPRi Plasmid Targeting MSMEG_4258
recombinant DNA reagent	plJR962::MSMEG_4260	This Paper		CRISPRi Plasmid Targeting MSMEG_4260
recombinant DNA reagent	plJR962::MSMEG_4261	This Paper		CRISPRi Plasmid Targeting MSMEG_4261
recombinant DNA reagent	plJR962::MSMEG_4262	This Paper		CRISPRi Plasmid Targeting MSMEG_4262
recombinant DNA reagent	plJR962::MSMEG_4263	This Paper		CRISPRi Plasmid Targeting MSMEG_4263
recombinant DNA reagent	plJR962::MSMEG_4268	This Paper		CRISPRi Plasmid Targeting MSMEG_4268
recombinant DNA reagent	plJR962::MSMEG_4276	This Paper		CRISPRi Plasmid Targeting MSMEG_4276
recombinant DNA reagent	plJR962::MSMEG_4283	This Paper		CRISPRi Plasmid Targeting MSMEG_4283
recombinant DNA reagent	plJR962::MSMEG_4286	This Paper		CRISPRi Plasmid Targeting MSMEG_4286
recombinant DNA reagent	plJR962::MSMEG_4294	This Paper		CRISPRi Plasmid Targeting MSMEG_4294
recombinant DNA reagent	plJR962::MSMEG_4325	This Paper		CRISPRi Plasmid Targeting MSMEG_4325
recombinant DNA reagent	plJR962::MSMEG_4482	This Paper		CRISPRi Plasmid Targeting MSMEG_4482
recombinant DNA reagent	plJR962::MSMEG_4485	This Paper		CRISPRi Plasmid Targeting MSMEG_4485
recombinant DNA reagent	plJR962::MSMEG_4493	This Paper		CRISPRi Plasmid Targeting MSMEG_4493
recombinant DNA reagent	plJR962::MSMEG_4527	This Paper		CRISPRi Plasmid Targeting MSMEG_4527
recombinant DNA reagent	plJR962::MSMEG_4571	This Paper		CRISPRi Plasmid Targeting MSMEG_4571
recombinant DNA reagent	plJR962::MSMEG_4617	This Paper		CRISPRi Plasmid Targeting MSMEG_4617
recombinant DNA reagent	plJR962::MSMEG_4621	This Paper		CRISPRi Plasmid Targeting MSMEG_4621
recombinant DNA reagent	plJR962::MSMEG_4623	This Paper		CRISPRi Plasmid Targeting MSMEG_4623
recombinant DNA reagent	plJR962::MSMEG_4626	This Paper		CRISPRi Plasmid Targeting MSMEG_4626
recombinant DNA reagent	plJR962::MSMEG_4630	This Paper		CRISPRi Plasmid Targeting MSMEG_4630
recombinant DNA reagent	plJR962::MSMEG_4645	This Paper		CRISPRi Plasmid Targeting MSMEG_4645
recombinant DNA reagent	plJR962::MSMEG_4646	This Paper		CRISPRi Plasmid Targeting MSMEG_4646
recombinant DNA reagent	plJR962::MSMEG_4671	This Paper		CRISPRi Plasmid Targeting MSMEG_4671
recombinant DNA reagent	plJR962::MSMEG_4672	This Paper		CRISPRi Plasmid Targeting MSMEG_4672
recombinant DNA reagent	plJR962::MSMEG_4684	This Paper		CRISPRi Plasmid Targeting MSMEG_4684
recombinant DNA reagent	plJR962::MSMEG_4700	This Paper		CRISPRi Plasmid Targeting MSMEG_4700
recombinant DNA reagent	plJR962::MSMEG_4702	This Paper		CRISPRi Plasmid Targeting MSMEG_4702
recombinant DNA reagent	plJR962::MSMEG_4757	This Paper		CRISPRi Plasmid Targeting MSMEG_4757
recombinant DNA reagent	plJR962::MSMEG_4935	This Paper		CRISPRi Plasmid Targeting MSMEG_4935
recombinant DNA reagent	plJR962::MSMEG_4936	This Paper		CRISPRi Plasmid Targeting MSMEG_4936
recombinant DNA reagent	plJR962::MSMEG_4937	This Paper		CRISPRi Plasmid Targeting MSMEG_4937
recombinant DNA reagent	plJR962::MSMEG_4938	This Paper		CRISPRi Plasmid Targeting MSMEG_4938
recombinant DNA reagent	plJR962::MSMEG_4941	This Paper		CRISPRi Plasmid Targeting MSMEG_4941
recombinant DNA reagent	plJR962::MSMEG_4942	This Paper		CRISPRi Plasmid Targeting MSMEG_4942
recombinant DNA reagent	plJR962::MSMEG_4947	This Paper		CRISPRi Plasmid Targeting MSMEG_4947
recombinant DNA reagent	plJR962::MSMEG_4956	This Paper		CRISPRi Plasmid Targeting MSMEG_4956
recombinant DNA reagent	plJR962::MSMEG_4957	This Paper		CRISPRi Plasmid Targeting MSMEG_4957
recombinant DNA reagent	plJR962::MSMEG_4958	This Paper		CRISPRi Plasmid Targeting MSMEG_4958
recombinant DNA reagent	plJR962::MSMEG_4959	This Paper		CRISPRi Plasmid Targeting MSMEG_4959
recombinant DNA reagent	plJR962::MSMEG_5103	This Paper		CRISPRi Plasmid Targeting MSMEG_5103
recombinant DNA reagent	plJR962::MSMEG_5224	This Paper		CRISPRi Plasmid Targeting MSMEG_5224
recombinant DNA reagent	plJR962::MSMEG_5248	This Paper		CRISPRi Plasmid Targeting MSMEG_5248
recombinant DNA reagent	plJR962::MSMEG_5249	This Paper		CRISPRi Plasmid Targeting MSMEG_5249
recombinant DNA reagent	plJR962::MSMEG_5414	This Paper		CRISPRi Plasmid Targeting MSMEG_5414
recombinant DNA reagent	plJR962::MSMEG_5415	This Paper		CRISPRi Plasmid Targeting MSMEG_5415
recombinant DNA reagent	plJR962::MSMEG_5435	This Paper		CRISPRi Plasmid Targeting MSMEG_5435
recombinant DNA reagent	plJR962::MSMEG_5441	This Paper		CRISPRi Plasmid Targeting MSMEG_5441
recombinant DNA reagent	plJR962::MSMEG_5515	This Paper		CRISPRi Plasmid Targeting MSMEG_5515
recombinant DNA reagent	plJR962::MSMEG_5684	This Paper		CRISPRi Plasmid Targeting MSMEG_5684
recombinant DNA reagent	plJR962::MSMEG_5798	This Paper		CRISPRi Plasmid Targeting MSMEG_5798
recombinant DNA reagent	plJR962::MSMEG_5800	This Paper		CRISPRi Plasmid Targeting MSMEG_5800
recombinant DNA reagent	plJR962::MSMEG_5824	This Paper		CRISPRi Plasmid Targeting MSMEG_5824
recombinant DNA reagent	plJR962::MSMEG_5831	This Paper		CRISPRi Plasmid Targeting MSMEG_5831
recombinant DNA reagent	plJR962::MSMEG_5841	This Paper		CRISPRi Plasmid Targeting MSMEG_5841
recombinant DNA reagent	plJR962::MSMEG_5852	This Paper		CRISPRi Plasmid Targeting MSMEG_5852
recombinant DNA reagent	plJR962::MSMEG_6074	This Paper		CRISPRi Plasmid Targeting MSMEG_6074
recombinant DNA reagent	plJR962::MSMEG_6076	This Paper		CRISPRi Plasmid Targeting MSMEG_6076
recombinant DNA reagent	plJR962::MSMEG_6077	This Paper		CRISPRi Plasmid Targeting MSMEG_6077
recombinant DNA reagent	plJR962::MSMEG_6091	This Paper		CRISPRi Plasmid Targeting MSMEG_6091
recombinant DNA reagent	plJR962::MSMEG_6094	This Paper		CRISPRi Plasmid Targeting MSMEG_6094
recombinant DNA reagent	plJR962::MSMEG_6103	This Paper		CRISPRi Plasmid Targeting MSMEG_6103
recombinant DNA reagent	plJR962::MSMEG_6104	This Paper		CRISPRi Plasmid Targeting MSMEG_6104
recombinant DNA reagent	plJR962::MSMEG_6182	This Paper		CRISPRi Plasmid Targeting MSMEG_6182
recombinant DNA reagent	plJR962::MSMEG_6184	This Paper		CRISPRi Plasmid Targeting MSMEG_6184
recombinant DNA reagent	plJR962::MSMEG_6256	This Paper		CRISPRi Plasmid Targeting MSMEG_6256
recombinant DNA reagent	plJR962::MSMEG_6276	This Paper		CRISPRi Plasmid Targeting MSMEG_6276
recombinant DNA reagent	plJR962::MSMEG_6277	This Paper		CRISPRi Plasmid Targeting MSMEG_6277
recombinant DNA reagent	plJR962::MSMEG_6285	This Paper		CRISPRi Plasmid Targeting MSMEG_6285
recombinant DNA reagent	plJR962::MSMEG_6286	This Paper		CRISPRi Plasmid Targeting MSMEG_6286
recombinant DNA reagent	plJR962::MSMEG_6330	This Paper		CRISPRi Plasmid Targeting MSMEG_6330
recombinant DNA reagent	plJR962::MSMEG_6366	This Paper		CRISPRi Plasmid Targeting MSMEG_6366
recombinant DNA reagent	plJR962::MSMEG_6367	This Paper		CRISPRi Plasmid Targeting MSMEG_6367
recombinant DNA reagent	plJR962::MSMEG_6382	This Paper		CRISPRi Plasmid Targeting MSMEG_6382
recombinant DNA reagent	plJR962::MSMEG_6386	This Paper		CRISPRi Plasmid Targeting MSMEG_6386
recombinant DNA reagent	plJR962::MSMEG_6391	This Paper		CRISPRi Plasmid Targeting MSMEG_6391
recombinant DNA reagent	plJR962::MSMEG_6392	This Paper		CRISPRi Plasmid Targeting MSMEG_6392
recombinant DNA reagent	plJR962::MSMEG_6401	This Paper		CRISPRi Plasmid Targeting MSMEG_6401
recombinant DNA reagent	plJR962::MSMEG_6403	This Paper		CRISPRi Plasmid Targeting MSMEG_6403
recombinant DNA reagent	plJR962::MSMEG_6404	This Paper		CRISPRi Plasmid Targeting MSMEG_6404
recombinant DNA reagent	plJR962::MSMEG_6413	This Paper		CRISPRi Plasmid Targeting MSMEG_6413
recombinant DNA reagent	plJR962::MSMEG_6520	This Paper		CRISPRi Plasmid Targeting MSMEG_6520
recombinant DNA reagent	plJR962::MSMEG_6892	This Paper		CRISPRi Plasmid Targeting MSMEG_6892
recombinant DNA reagent	plJR962::MSMEG_6895	This Paper		CRISPRi Plasmid Targeting MSMEG_6895
recombinant DNA reagent	plJR962::MSMEG_6896	This Paper		CRISPRi Plasmid Targeting MSMEG_6896
recombinant DNA reagent	plJR962::MSMEG_6900	This Paper		CRISPRi Plasmid Targeting MSMEG_6900
recombinant DNA reagent	plJR962::MSMEG_6904	This Paper		CRISPRi Plasmid Targeting MSMEG_6904
recombinant DNA reagent	plJR962::MSMEG_6917	This Paper		CRISPRi Plasmid Targeting MSMEG_6917
recombinant DNA reagent	plJR962::MSMEG_6926	This Paper		CRISPRi Plasmid Targeting MSMEG_6926
recombinant DNA reagent	plJR962::MSMEG_6927	This Paper		CRISPRi Plasmid Targeting MSMEG_6927
recombinant DNA reagent	plJR962::MSMEG_6928	This Paper		CRISPRi Plasmid Targeting MSMEG_6928
recombinant DNA reagent	plJR962::MSMEG_6929	This Paper		CRISPRi Plasmid Targeting MSMEG_6929
recombinant DNA reagent	plJR962::MSMEG_6942	This Paper		CRISPRi Plasmid Targeting MSMEG_6942
recombinant DNA reagent	plJR962::MSMEG_6946	This Paper		CRISPRi Plasmid Targeting MSMEG_6946
recombinant DNA reagent	plJR962::MSMEG_6947	This Paper		CRISPRi Plasmid Targeting MSMEG_6947

## Sheet: strain, strain background
Reagent type (species) or resource	Designation	Source or refrence	Identifiers	Additional Information		Imaged
strain, strain background (M. smegmatis)	MSMEG_0001	This paper		ParB-mCherry plJR962::MSMEG_0001		TRUE
strain, strain background (M. smegmatis)	MSMEG_0005	This paper		ParB-mCherry plJR962::MSMEG_0005		TRUE
strain, strain background (M. smegmatis)	MSMEG_0006	This paper		ParB-mCherry plJR962::MSMEG_0006		TRUE
strain, strain background (M. smegmatis)	MSMEG_0028	This paper		ParB-mCherry plJR962::MSMEG_0028		TRUE
strain, strain background (M. smegmatis)	MSMEG_0030	This paper		ParB-mCherry plJR962::MSMEG_0030		TRUE
strain, strain background (M. smegmatis)	MSMEG_0250	This paper		ParB-mCherry plJR962::MSMEG_0250		TRUE
strain, strain background (M. smegmatis)	MSMEG_0317	This paper		ParB-mCherry plJR962::MSMEG_0317		TRUE
strain, strain background (M. smegmatis)	MSMEG_0384	This paper		ParB-mCherry plJR962::MSMEG_0384		TRUE
strain, strain background (M. smegmatis)	MSMEG_0690	This paper		ParB-mCherry plJR962::MSMEG_0690		TRUE
strain, strain background (M. smegmatis)	MSMEG_0759	This paper		ParB-mCherry plJR962::MSMEG_0759		TRUE
strain, strain background (M. smegmatis)	MSMEG_0880	This paper		ParB-mCherry plJR962::MSMEG_0880		TRUE
strain, strain background (M. smegmatis)	MSMEG_0903	This paper		ParB-mCherry plJR962::MSMEG_0903		TRUE
strain, strain background (M. smegmatis)	MSMEG_0949	This paper		ParB-mCherry plJR962::MSMEG_0949		TRUE
strain, strain background (M. smegmatis)	MSMEG_0952	This paper		ParB-mCherry plJR962::MSMEG_0952		TRUE
strain, strain background (M. smegmatis)	MSMEG_0953	This paper		ParB-mCherry plJR962::MSMEG_0953		TRUE
strain, strain background (M. smegmatis)	MSMEG_0954	This paper		ParB-mCherry plJR962::MSMEG_0954		TRUE
strain, strain background (M. smegmatis)	MSMEG_0956	This paper		ParB-mCherry plJR962::MSMEG_0956		TRUE
strain, strain background (M. smegmatis)	MSMEG_0969	This paper		ParB-mCherry plJR962::MSMEG_0969		TRUE
strain, strain background (M. smegmatis)	MSMEG_0972	This paper		ParB-mCherry plJR962::MSMEG_0972		TRUE
strain, strain background (M. smegmatis)	MSMEG_0973	This paper		ParB-mCherry plJR962::MSMEG_0973		TRUE
strain, strain background (M. smegmatis)	MSMEG_0974	This paper		ParB-mCherry plJR962::MSMEG_0974		TRUE
strain, strain background (M. smegmatis)	MSMEG_0988	This paper		ParB-mCherry plJR962::MSMEG_0988		TRUE
strain, strain background (M. smegmatis)	MSMEG_1075	This paper		ParB-mCherry plJR962::MSMEG_1075		TRUE
strain, strain background (M. smegmatis)	MSMEG_1109	This paper		ParB-mCherry plJR962::MSMEG_1109		TRUE
strain, strain background (M. smegmatis)	MSMEG_1115	This paper		ParB-mCherry plJR962::MSMEG_1115		TRUE
strain, strain background (M. smegmatis)	MSMEG_1344	This paper		ParB-mCherry plJR962::MSMEG_1344		TRUE
strain, strain background (M. smegmatis)	MSMEG_1345	This paper		ParB-mCherry plJR962::MSMEG_1345		TRUE
strain, strain background (M. smegmatis)	MSMEG_1346	This paper		ParB-mCherry plJR962::MSMEG_1346		TRUE
strain, strain background (M. smegmatis)	MSMEG_1347	This paper		ParB-mCherry plJR962::MSMEG_1347		TRUE
strain, strain background (M. smegmatis)	MSMEG_1367_A	This paper		ParB-mCherry plJR962::MSMEG_1367_A		TRUE
strain, strain background (M. smegmatis)	MSMEG_1367_B	This paper		ParB-mCherry plJR962::MSMEG_1367_B		TRUE
strain, strain background (M. smegmatis)	MSMEG_1368_A	This paper		ParB-mCherry plJR962::MSMEG_1368_A		TRUE
strain, strain background (M. smegmatis)	MSMEG_1368_B	This paper		ParB-mCherry plJR962::MSMEG_1368_B		TRUE
strain, strain background (M. smegmatis)	MSMEG_1398	This paper		ParB-mCherry plJR962::MSMEG_1398		TRUE
strain, strain background (M. smegmatis)	MSMEG_1399	This paper		ParB-mCherry plJR962::MSMEG_1399		TRUE
strain, strain background (M. smegmatis)	MSMEG_1401	This paper		ParB-mCherry plJR962::MSMEG_1401		TRUE
strain, strain background (M. smegmatis)	MSMEG_1436	This paper		ParB-mCherry plJR962::MSMEG_1436		TRUE
strain, strain background (M. smegmatis)	MSMEG_1437	This paper		ParB-mCherry plJR962::MSMEG_1437		TRUE
strain, strain background (M. smegmatis)	MSMEG_1438	This paper		ParB-mCherry plJR962::MSMEG_1438		TRUE
strain, strain background (M. smegmatis)	MSMEG_1439	This paper		ParB-mCherry plJR962::MSMEG_1439		TRUE
strain, strain background (M. smegmatis)	MSMEG_1440	This paper		ParB-mCherry plJR962::MSMEG_1440		TRUE
strain, strain background (M. smegmatis)	MSMEG_1441	This paper		ParB-mCherry plJR962::MSMEG_1441		TRUE
strain, strain background (M. smegmatis)	MSMEG_1442	This paper		ParB-mCherry plJR962::MSMEG_1442		TRUE
strain, strain background (M. smegmatis)	MSMEG_1443	This paper		ParB-mCherry plJR962::MSMEG_1443		TRUE
strain, strain background (M. smegmatis)	MSMEG_1444	This paper		ParB-mCherry plJR962::MSMEG_1444		TRUE
strain, strain background (M. smegmatis)	MSMEG_1445	This paper		ParB-mCherry plJR962::MSMEG_1445		TRUE
strain, strain background (M. smegmatis)	MSMEG_1465	This paper		ParB-mCherry plJR962::MSMEG_1465		TRUE
strain, strain background (M. smegmatis)	MSMEG_1467	This paper		ParB-mCherry plJR962::MSMEG_1467		TRUE
strain, strain background (M. smegmatis)	MSMEG_1469	This paper		ParB-mCherry plJR962::MSMEG_1469		TRUE
strain, strain background (M. smegmatis)	MSMEG_1470	This paper		ParB-mCherry plJR962::MSMEG_1470		TRUE
strain, strain background (M. smegmatis)	MSMEG_1471	This paper		ParB-mCherry plJR962::MSMEG_1471		TRUE
strain, strain background (M. smegmatis)	MSMEG_1472	This paper		ParB-mCherry plJR962::MSMEG_1472		TRUE
strain, strain background (M. smegmatis)	MSMEG_1474	This paper		ParB-mCherry plJR962::MSMEG_1474		TRUE
strain, strain background (M. smegmatis)	MSMEG_1483	This paper		ParB-mCherry plJR962::MSMEG_1483		TRUE
strain, strain background (M. smegmatis)	MSMEG_1512	This paper		ParB-mCherry plJR962::MSMEG_1512		TRUE
strain, strain background (M. smegmatis)	MSMEG_1519	This paper		ParB-mCherry plJR962::MSMEG_1519		TRUE
strain, strain background (M. smegmatis)	MSMEG_1521	This paper		ParB-mCherry plJR962::MSMEG_1521		TRUE
strain, strain background (M. smegmatis)	MSMEG_1522	This paper		ParB-mCherry plJR962::MSMEG_1522		TRUE
strain, strain background (M. smegmatis)	MSMEG_1523	This paper		ParB-mCherry plJR962::MSMEG_1523		TRUE
strain, strain background (M. smegmatis)	MSMEG_1524	This paper		ParB-mCherry plJR962::MSMEG_1524		TRUE
strain, strain background (M. smegmatis)	MSMEG_1556	This paper		ParB-mCherry plJR962::MSMEG_1556		TRUE
strain, strain background (M. smegmatis)	MSMEG_1557	This paper		ParB-mCherry plJR962::MSMEG_1557		TRUE
strain, strain background (M. smegmatis)	MSMEG_1568	This paper		ParB-mCherry plJR962::MSMEG_1568		TRUE
strain, strain background (M. smegmatis)	MSMEG_1582	This paper		ParB-mCherry plJR962::MSMEG_1582		TRUE
strain, strain background (M. smegmatis)	MSMEG_1602	This paper		ParB-mCherry plJR962::MSMEG_1602		TRUE
strain, strain background (M. smegmatis)	MSMEG_1657	This paper		ParB-mCherry plJR962::MSMEG_1657		TRUE
strain, strain background (M. smegmatis)	MSMEG_1670	This paper		ParB-mCherry plJR962::MSMEG_1670		TRUE
strain, strain background (M. smegmatis)	MSMEG_1671	This paper		ParB-mCherry plJR962::MSMEG_1671		TRUE
strain, strain background (M. smegmatis)	MSMEG_1807	This paper		ParB-mCherry plJR962::MSMEG_1807		TRUE
strain, strain background (M. smegmatis)	MSMEG_1812	This paper		ParB-mCherry plJR962::MSMEG_1812		TRUE
strain, strain background (M. smegmatis)	MSMEG_1813	This paper		ParB-mCherry plJR962::MSMEG_1813		TRUE
strain, strain background (M. smegmatis)	MSMEG_1819	This paper		ParB-mCherry plJR962::MSMEG_1819		TRUE
strain, strain background (M. smegmatis)	MSMEG_1826	This paper		ParB-mCherry plJR962::MSMEG_1826		TRUE
strain, strain background (M. smegmatis)	MSMEG_1834	This paper		ParB-mCherry plJR962::MSMEG_1834		TRUE
strain, strain background (M. smegmatis)	MSMEG_1836	This paper		ParB-mCherry plJR962::MSMEG_1836		TRUE
strain, strain background (M. smegmatis)	MSMEG_1890	This paper		ParB-mCherry plJR962::MSMEG_1890		TRUE
strain, strain background (M. smegmatis)	MSMEG_2086	This paper		ParB-mCherry plJR962::MSMEG_2086		TRUE
strain, strain background (M. smegmatis)	MSMEG_2365	This paper		ParB-mCherry plJR962::MSMEG_2365		TRUE
strain, strain background (M. smegmatis)	MSMEG_2367	This paper		ParB-mCherry plJR962::MSMEG_2367		TRUE
strain, strain background (M. smegmatis)	MSMEG_2372	This paper		ParB-mCherry plJR962::MSMEG_2372		TRUE
strain, strain background (M. smegmatis)	MSMEG_2373	This paper		ParB-mCherry plJR962::MSMEG_2373		TRUE
strain, strain background (M. smegmatis)	MSMEG_2374	This paper		ParB-mCherry plJR962::MSMEG_2374		TRUE
strain, strain background (M. smegmatis)	MSMEG_2378	This paper		ParB-mCherry plJR962::MSMEG_2378		TRUE
strain, strain background (M. smegmatis)	MSMEG_2379	This paper		ParB-mCherry plJR962::MSMEG_2379		TRUE
strain, strain background (M. smegmatis)	MSMEG_2383	This paper		ParB-mCherry plJR962::MSMEG_2383		TRUE
strain, strain background (M. smegmatis)	MSMEG_2388	This paper		ParB-mCherry plJR962::MSMEG_2388		TRUE
strain, strain background (M. smegmatis)	MSMEG_2410	This paper		ParB-mCherry plJR962::MSMEG_2410		TRUE
strain, strain background (M. smegmatis)	MSMEG_2411	This paper		ParB-mCherry plJR962::MSMEG_2411		TRUE
strain, strain background (M. smegmatis)	MSMEG_2435	This paper		ParB-mCherry plJR962::MSMEG_2435		TRUE
strain, strain background (M. smegmatis)	MSMEG_2438	This paper		ParB-mCherry plJR962::MSMEG_2438		TRUE
strain, strain background (M. smegmatis)	MSMEG_2440	This paper		ParB-mCherry plJR962::MSMEG_2440		TRUE
strain, strain background (M. smegmatis)	MSMEG_2441	This paper		ParB-mCherry plJR962::MSMEG_2441		TRUE
strain, strain background (M. smegmatis)	MSMEG_2540	This paper		ParB-mCherry plJR962::MSMEG_2540		TRUE
strain, strain background (M. smegmatis)	MSMEG_2578	This paper		ParB-mCherry plJR962::MSMEG_2578		TRUE
strain, strain background (M. smegmatis)	MSMEG_2613	This paper		ParB-mCherry plJR962::MSMEG_2613		TRUE
strain, strain background (M. smegmatis)	MSMEG_2618	This paper		ParB-mCherry plJR962::MSMEG_2618		TRUE
strain, strain background (M. smegmatis)	MSMEG_2621	This paper		ParB-mCherry plJR962::MSMEG_2621		TRUE
strain, strain background (M. smegmatis)	MSMEG_2625	This paper		ParB-mCherry plJR962::MSMEG_2625		TRUE
strain, strain background (M. smegmatis)	MSMEG_2628	This paper		ParB-mCherry plJR962::MSMEG_2628		TRUE
strain, strain background (M. smegmatis)	MSMEG_2653	This paper		ParB-mCherry plJR962::MSMEG_2653		TRUE
strain, strain background (M. smegmatis)	MSMEG_2656	This paper		ParB-mCherry plJR962::MSMEG_2656		TRUE
strain, strain background (M. smegmatis)	MSMEG_2670	This paper		ParB-mCherry plJR962::MSMEG_2670		TRUE
strain, strain background (M. smegmatis)	MSMEG_2684	This paper		ParB-mCherry plJR962::MSMEG_2684		TRUE
strain, strain background (M. smegmatis)	MSMEG_2690_A	This paper		ParB-mCherry plJR962::MSMEG_2690_A		TRUE
strain, strain background (M. smegmatis)	MSMEG_2690_B	This paper		ParB-mCherry plJR962::MSMEG_2690_B		TRUE
strain, strain background (M. smegmatis)	MSMEG_2758	This paper		ParB-mCherry plJR962::MSMEG_2758		TRUE
strain, strain background (M. smegmatis)	MSMEG_2776	This paper		ParB-mCherry plJR962::MSMEG_2776		TRUE
strain, strain background (M. smegmatis)	MSMEG_2780	This paper		ParB-mCherry plJR962::MSMEG_2780		TRUE
strain, strain background (M. smegmatis)	MSMEG_2782	This paper		ParB-mCherry plJR962::MSMEG_2782		TRUE
strain, strain background (M. smegmatis)	MSMEG_2931	This paper		ParB-mCherry plJR962::MSMEG_2931		TRUE
strain, strain background (M. smegmatis)	MSMEG_2934	This paper		ParB-mCherry plJR962::MSMEG_2934		TRUE
strain, strain background (M. smegmatis)	MSMEG_2935	This paper		ParB-mCherry plJR962::MSMEG_2935		TRUE
strain, strain background (M. smegmatis)	MSMEG_2961	This paper		ParB-mCherry plJR962::MSMEG_2961		TRUE
strain, strain background (M. smegmatis)	MSMEG_2962	This paper		ParB-mCherry plJR962::MSMEG_2962		TRUE
strain, strain background (M. smegmatis)	MSMEG_2976	This paper		ParB-mCherry plJR962::MSMEG_2976		TRUE
strain, strain background (M. smegmatis)	MSMEG_3003	This paper		ParB-mCherry plJR962::MSMEG_3003		TRUE
strain, strain background (M. smegmatis)	MSMEG_3025	This paper		ParB-mCherry plJR962::MSMEG_3025		TRUE
strain, strain background (M. smegmatis)	MSMEG_3030	This paper		ParB-mCherry plJR962::MSMEG_3030		TRUE
strain, strain background (M. smegmatis)	MSMEG_3031	This paper		ParB-mCherry plJR962::MSMEG_3031		TRUE
strain, strain background (M. smegmatis)	MSMEG_3046	This paper		ParB-mCherry plJR962::MSMEG_3046		TRUE
strain, strain background (M. smegmatis)	MSMEG_3047	This paper		ParB-mCherry plJR962::MSMEG_3047		TRUE
strain, strain background (M. smegmatis)	MSMEG_3048	This paper		ParB-mCherry plJR962::MSMEG_3048		TRUE
strain, strain background (M. smegmatis)	MSMEG_3051	This paper		ParB-mCherry plJR962::MSMEG_3051		TRUE
strain, strain background (M. smegmatis)	MSMEG_3053	This paper		ParB-mCherry plJR962::MSMEG_3053		TRUE
strain, strain background (M. smegmatis)	MSMEG_3054	This paper		ParB-mCherry plJR962::MSMEG_3054		TRUE
strain, strain background (M. smegmatis)	MSMEG_3055	This paper		ParB-mCherry plJR962::MSMEG_3055		TRUE
strain, strain background (M. smegmatis)	MSMEG_3061	This paper		ParB-mCherry plJR962::MSMEG_3061		TRUE
strain, strain background (M. smegmatis)	MSMEG_3066	This paper		ParB-mCherry plJR962::MSMEG_3066		TRUE
strain, strain background (M. smegmatis)	MSMEG_3072	This paper		ParB-mCherry plJR962::MSMEG_3072		TRUE
strain, strain background (M. smegmatis)	MSMEG_3081	This paper		ParB-mCherry plJR962::MSMEG_3081		TRUE
strain, strain background (M. smegmatis)	MSMEG_3084	This paper		ParB-mCherry plJR962::MSMEG_3084		TRUE
strain, strain background (M. smegmatis)	MSMEG_3103	This paper		ParB-mCherry plJR962::MSMEG_3103		TRUE
strain, strain background (M. smegmatis)	MSMEG_3123	This paper		ParB-mCherry plJR962::MSMEG_3123		TRUE
strain, strain background (M. smegmatis)	MSMEG_3124	This paper		ParB-mCherry plJR962::MSMEG_3124		TRUE
strain, strain background (M. smegmatis)	MSMEG_3125	This paper		ParB-mCherry plJR962::MSMEG_3125		TRUE
strain, strain background (M. smegmatis)	MSMEG_3143	This paper		ParB-mCherry plJR962::MSMEG_3143		TRUE
strain, strain background (M. smegmatis)	MSMEG_3150	This paper		ParB-mCherry plJR962::MSMEG_3150		TRUE
strain, strain background (M. smegmatis)	MSMEG_3151	This paper		ParB-mCherry plJR962::MSMEG_3151		TRUE
strain, strain background (M. smegmatis)	MSMEG_3152	This paper		ParB-mCherry plJR962::MSMEG_3152		TRUE
strain, strain background (M. smegmatis)	MSMEG_3169	This paper		ParB-mCherry plJR962::MSMEG_3169		TRUE
strain, strain background (M. smegmatis)	MSMEG_3178	This paper		ParB-mCherry plJR962::MSMEG_3178		TRUE
strain, strain background (M. smegmatis)	MSMEG_3206	This paper		ParB-mCherry plJR962::MSMEG_3206		TRUE
strain, strain background (M. smegmatis)	MSMEG_3207	This paper		ParB-mCherry plJR962::MSMEG_3207		TRUE
strain, strain background (M. smegmatis)	MSMEG_3208	This paper		ParB-mCherry plJR962::MSMEG_3208		TRUE
strain, strain background (M. smegmatis)	MSMEG_3209	This paper		ParB-mCherry plJR962::MSMEG_3209		TRUE
strain, strain background (M. smegmatis)	MSMEG_3211	This paper		ParB-mCherry plJR962::MSMEG_3211		TRUE
strain, strain background (M. smegmatis)	MSMEG_3213	This paper		ParB-mCherry plJR962::MSMEG_3213		TRUE
strain, strain background (M. smegmatis)	MSMEG_3219	This paper		ParB-mCherry plJR962::MSMEG_3219		TRUE
strain, strain background (M. smegmatis)	MSMEG_3220	This paper		ParB-mCherry plJR962::MSMEG_3220		TRUE
strain, strain background (M. smegmatis)	MSMEG_3221	This paper		ParB-mCherry plJR962::MSMEG_3221		TRUE
strain, strain background (M. smegmatis)	MSMEG_3621	This paper		ParB-mCherry plJR962::MSMEG_3621		TRUE
strain, strain background (M. smegmatis)	MSMEG_3652	This paper		ParB-mCherry plJR962::MSMEG_3652		TRUE
strain, strain background (M. smegmatis)	MSMEG_3738	This paper		ParB-mCherry plJR962::MSMEG_3738		TRUE
strain, strain background (M. smegmatis)	MSMEG_3739	This paper		ParB-mCherry plJR962::MSMEG_3739		TRUE
strain, strain background (M. smegmatis)	MSMEG_3746	This paper		ParB-mCherry plJR962::MSMEG_3746		TRUE
strain, strain background (M. smegmatis)	MSMEG_3758	This paper		ParB-mCherry plJR962::MSMEG_3758		TRUE
strain, strain background (M. smegmatis)	MSMEG_3769	This paper		ParB-mCherry plJR962::MSMEG_3769		TRUE
strain, strain background (M. smegmatis)	MSMEG_3770	This paper		ParB-mCherry plJR962::MSMEG_3770		TRUE
strain, strain background (M. smegmatis)	MSMEG_3772	This paper		ParB-mCherry plJR962::MSMEG_3772		TRUE
strain, strain background (M. smegmatis)	MSMEG_3775	This paper		ParB-mCherry plJR962::MSMEG_3775		TRUE
strain, strain background (M. smegmatis)	MSMEG_3776	This paper		ParB-mCherry plJR962::MSMEG_3776		TRUE
strain, strain background (M. smegmatis)	MSMEG_3777	This paper		ParB-mCherry plJR962::MSMEG_3777		TRUE
strain, strain background (M. smegmatis)	MSMEG_3778	This paper		ParB-mCherry plJR962::MSMEG_3778		TRUE
strain, strain background (M. smegmatis)	MSMEG_3791	This paper		ParB-mCherry plJR962::MSMEG_3791		TRUE
strain, strain background (M. smegmatis)	MSMEG_3793	This paper		ParB-mCherry plJR962::MSMEG_3793		TRUE
strain, strain background (M. smegmatis)	MSMEG_3833	This paper		ParB-mCherry plJR962::MSMEG_3833		TRUE
strain, strain background (M. smegmatis)	MSMEG_3858	This paper		ParB-mCherry plJR962::MSMEG_3858		TRUE
strain, strain background (M. smegmatis)	MSMEG_3886	This paper		ParB-mCherry plJR962::MSMEG_3886		TRUE
strain, strain background (M. smegmatis)	MSMEG_4180	This paper		ParB-mCherry plJR962::MSMEG_4180		TRUE
strain, strain background (M. smegmatis)	MSMEG_4185	This paper		ParB-mCherry plJR962::MSMEG_4185		TRUE
strain, strain background (M. smegmatis)	MSMEG_4198	This paper		ParB-mCherry plJR962::MSMEG_4198		TRUE
strain, strain background (M. smegmatis)	MSMEG_4217_A	This paper		ParB-mCherry plJR962::MSMEG_4217_A		TRUE
strain, strain background (M. smegmatis)	MSMEG_4217_B	This paper		ParB-mCherry plJR962::MSMEG_4217_B		TRUE
strain, strain background (M. smegmatis)	MSMEG_4217_C	This paper		ParB-mCherry plJR962::MSMEG_4217_C		TRUE
strain, strain background (M. smegmatis)	MSMEG_4219	This paper		ParB-mCherry plJR962::MSMEG_4219		TRUE
strain, strain background (M. smegmatis)	MSMEG_4222_A	This paper		ParB-mCherry plJR962::MSMEG_4222_A		TRUE
strain, strain background (M. smegmatis)	MSMEG_4222_B	This paper		ParB-mCherry plJR962::MSMEG_4222_B		TRUE
strain, strain background (M. smegmatis)	MSMEG_4222_C	This paper		ParB-mCherry plJR962::MSMEG_4222_C		TRUE
strain, strain background (M. smegmatis)	MSMEG_4226	This paper		ParB-mCherry plJR962::MSMEG_4226		TRUE
strain, strain background (M. smegmatis)	MSMEG_4227	This paper		ParB-mCherry plJR962::MSMEG_4227		TRUE
strain, strain background (M. smegmatis)	MSMEG_4228	This paper		ParB-mCherry plJR962::MSMEG_4228		TRUE
strain, strain background (M. smegmatis)	MSMEG_4229	This paper		ParB-mCherry plJR962::MSMEG_4229		TRUE
strain, strain background (M. smegmatis)	MSMEG_4230	This paper		ParB-mCherry plJR962::MSMEG_4230		TRUE
strain, strain background (M. smegmatis)	MSMEG_4231	This paper		ParB-mCherry plJR962::MSMEG_4231		TRUE
strain, strain background (M. smegmatis)	MSMEG_4232	This paper		ParB-mCherry plJR962::MSMEG_4232		TRUE
strain, strain background (M. smegmatis)	MSMEG_4234	This paper		ParB-mCherry plJR962::MSMEG_4234		TRUE
strain, strain background (M. smegmatis)	MSMEG_4248	This paper		ParB-mCherry plJR962::MSMEG_4248		TRUE
strain, strain background (M. smegmatis)	MSMEG_4253	This paper		ParB-mCherry plJR962::MSMEG_4253		TRUE
strain, strain background (M. smegmatis)	MSMEG_4258	This paper		ParB-mCherry plJR962::MSMEG_4258		TRUE
strain, strain background (M. smegmatis)	MSMEG_4260	This paper		ParB-mCherry plJR962::MSMEG_4260		TRUE
strain, strain background (M. smegmatis)	MSMEG_4261	This paper		ParB-mCherry plJR962::MSMEG_4261		TRUE
strain, strain background (M. smegmatis)	MSMEG_4262	This paper		ParB-mCherry plJR962::MSMEG_4262		TRUE
strain, strain background (M. smegmatis)	MSMEG_4263	This paper		ParB-mCherry plJR962::MSMEG_4263		TRUE
strain, strain background (M. smegmatis)	MSMEG_4268	This paper		ParB-mCherry plJR962::MSMEG_4268		TRUE
strain, strain background (M. smegmatis)	MSMEG_4276	This paper		ParB-mCherry plJR962::MSMEG_4276		TRUE
strain, strain background (M. smegmatis)	MSMEG_4283	This paper		ParB-mCherry plJR962::MSMEG_4283		TRUE
strain, strain background (M. smegmatis)	MSMEG_4286	This paper		ParB-mCherry plJR962::MSMEG_4286		TRUE
strain, strain background (M. smegmatis)	MSMEG_4294	This paper		ParB-mCherry plJR962::MSMEG_4294		TRUE
strain, strain background (M. smegmatis)	MSMEG_4325	This paper		ParB-mCherry plJR962::MSMEG_4325		TRUE
strain, strain background (M. smegmatis)	MSMEG_4482	This paper		ParB-mCherry plJR962::MSMEG_4482		TRUE
strain, strain background (M. smegmatis)	MSMEG_4485	This paper		ParB-mCherry plJR962::MSMEG_4485		TRUE
strain, strain background (M. smegmatis)	MSMEG_4493	This paper		ParB-mCherry plJR962::MSMEG_4493		TRUE
strain, strain background (M. smegmatis)	MSMEG_4527	This paper		ParB-mCherry plJR962::MSMEG_4527		TRUE
strain, strain background (M. smegmatis)	MSMEG_4571	This paper		ParB-mCherry plJR962::MSMEG_4571		TRUE
strain, strain background (M. smegmatis)	MSMEG_4617	This paper		ParB-mCherry plJR962::MSMEG_4617		TRUE
strain, strain background (M. smegmatis)	MSMEG_4621	This paper		ParB-mCherry plJR962::MSMEG_4621		TRUE
strain, strain background (M. smegmatis)	MSMEG_4623	This paper		ParB-mCherry plJR962::MSMEG_4623		TRUE
strain, strain background (M. smegmatis)	MSMEG_4626	This paper		ParB-mCherry plJR962::MSMEG_4626		TRUE
strain, strain background (M. smegmatis)	MSMEG_4630	This paper		ParB-mCherry plJR962::MSMEG_4630		TRUE
strain, strain background (M. smegmatis)	MSMEG_4645	This paper		ParB-mCherry plJR962::MSMEG_4645		TRUE
strain, strain background (M. smegmatis)	MSMEG_4646	This paper		ParB-mCherry plJR962::MSMEG_4646		TRUE
strain, strain background (M. smegmatis)	MSMEG_4671	This paper		ParB-mCherry plJR962::MSMEG_4671		TRUE
strain, strain background (M. smegmatis)	MSMEG_4672	This paper		ParB-mCherry plJR962::MSMEG_4672		TRUE
strain, strain background (M. smegmatis)	MSMEG_4684	This paper		ParB-mCherry plJR962::MSMEG_4684		TRUE
strain, strain background (M. smegmatis)	MSMEG_4700	This paper		ParB-mCherry plJR962::MSMEG_4700		TRUE
strain, strain background (M. smegmatis)	MSMEG_4702	This paper		ParB-mCherry plJR962::MSMEG_4702		TRUE
strain, strain background (M. smegmatis)	MSMEG_4757	This paper		ParB-mCherry plJR962::MSMEG_4757		TRUE
strain, strain background (M. smegmatis)	MSMEG_4935	This paper		ParB-mCherry plJR962::MSMEG_4935		TRUE
strain, strain background (M. smegmatis)	MSMEG_4936	This paper		ParB-mCherry plJR962::MSMEG_4936		TRUE
strain, strain background (M. smegmatis)	MSMEG_4937	This paper		ParB-mCherry plJR962::MSMEG_4937		TRUE
strain, strain background (M. smegmatis)	MSMEG_4938	This paper		ParB-mCherry plJR962::MSMEG_4938		TRUE
strain, strain background (M. smegmatis)	MSMEG_4941	This paper		ParB-mCherry plJR962::MSMEG_4941		TRUE
strain, strain background (M. smegmatis)	MSMEG_4942	This paper		ParB-mCherry plJR962::MSMEG_4942		TRUE
strain, strain background (M. smegmatis)	MSMEG_4947	This paper		ParB-mCherry plJR962::MSMEG_4947		TRUE
strain, strain background (M. smegmatis)	MSMEG_4956	This paper		ParB-mCherry plJR962::MSMEG_4956		TRUE
strain, strain background (M. smegmatis)	MSMEG_4957	This paper		ParB-mCherry plJR962::MSMEG_4957		TRUE
strain, strain background (M. smegmatis)	MSMEG_4958	This paper		ParB-mCherry plJR962::MSMEG_4958		TRUE
strain, strain background (M. smegmatis)	MSMEG_4959	This paper		ParB-mCherry plJR962::MSMEG_4959		TRUE
strain, strain background (M. smegmatis)	MSMEG_5103	This paper		ParB-mCherry plJR962::MSMEG_5103		TRUE
strain, strain background (M. smegmatis)	MSMEG_5224	This paper		ParB-mCherry plJR962::MSMEG_5224		TRUE
strain, strain background (M. smegmatis)	MSMEG_5248	This paper		ParB-mCherry plJR962::MSMEG_5248		TRUE
strain, strain background (M. smegmatis)	MSMEG_5249	This paper		ParB-mCherry plJR962::MSMEG_5249		TRUE
strain, strain background (M. smegmatis)	MSMEG_5414	This paper		ParB-mCherry plJR962::MSMEG_5414		TRUE
strain, strain background (M. smegmatis)	MSMEG_5415	This paper		ParB-mCherry plJR962::MSMEG_5415		TRUE
strain, strain background (M. smegmatis)	MSMEG_5435	This paper		ParB-mCherry plJR962::MSMEG_5435		TRUE
strain, strain background (M. smegmatis)	MSMEG_5441	This paper		ParB-mCherry plJR962::MSMEG_5441		TRUE
strain, strain background (M. smegmatis)	MSMEG_5515	This paper		ParB-mCherry plJR962::MSMEG_5515		TRUE
strain, strain background (M. smegmatis)	MSMEG_5684	This paper		ParB-mCherry plJR962::MSMEG_5684		TRUE
strain, strain background (M. smegmatis)	MSMEG_5798	This paper		ParB-mCherry plJR962::MSMEG_5798		TRUE
strain, strain background (M. smegmatis)	MSMEG_5800	This paper		ParB-mCherry plJR962::MSMEG_5800		TRUE
strain, strain background (M. smegmatis)	MSMEG_5824	This paper		ParB-mCherry plJR962::MSMEG_5824		TRUE
strain, strain background (M. smegmatis)	MSMEG_5831	This paper		ParB-mCherry plJR962::MSMEG_5831		TRUE
strain, strain background (M. smegmatis)	MSMEG_5841	This paper		ParB-mCherry plJR962::MSMEG_5841		TRUE
strain, strain background (M. smegmatis)	MSMEG_5852	This paper		ParB-mCherry plJR962::MSMEG_5852		TRUE
strain, strain background (M. smegmatis)	MSMEG_6074	This paper		ParB-mCherry plJR962::MSMEG_6074		TRUE
strain, strain background (M. smegmatis)	MSMEG_6076	This paper		ParB-mCherry plJR962::MSMEG_6076		TRUE
strain, strain background (M. smegmatis)	MSMEG_6077	This paper		ParB-mCherry plJR962::MSMEG_6077		TRUE
strain, strain background (M. smegmatis)	MSMEG_6091	This paper		ParB-mCherry plJR962::MSMEG_6091		TRUE
strain, strain background (M. smegmatis)	MSMEG_6094	This paper		ParB-mCherry plJR962::MSMEG_6094		TRUE
strain, strain background (M. smegmatis)	MSMEG_6103	This paper		ParB-mCherry plJR962::MSMEG_6103		TRUE
strain, strain background (M. smegmatis)	MSMEG_6104	This paper		ParB-mCherry plJR962::MSMEG_6104		TRUE
strain, strain background (M. smegmatis)	MSMEG_6182	This paper		ParB-mCherry plJR962::MSMEG_6182		TRUE
strain, strain background (M. smegmatis)	MSMEG_6184	This paper		ParB-mCherry plJR962::MSMEG_6184		TRUE
strain, strain background (M. smegmatis)	MSMEG_6256	This paper		ParB-mCherry plJR962::MSMEG_6256		TRUE
strain, strain background (M. smegmatis)	MSMEG_6276	This paper		ParB-mCherry plJR962::MSMEG_6276		TRUE
strain, strain background (M. smegmatis)	MSMEG_6277	This paper		ParB-mCherry plJR962::MSMEG_6277		TRUE
strain, strain background (M. smegmatis)	MSMEG_6285	This paper		ParB-mCherry plJR962::MSMEG_6285		TRUE
strain, strain background (M. smegmatis)	MSMEG_6286	This paper		ParB-mCherry plJR962::MSMEG_6286		TRUE
strain, strain background (M. smegmatis)	MSMEG_6330	This paper		ParB-mCherry plJR962::MSMEG_6330		TRUE
strain, strain background (M. smegmatis)	MSMEG_6366	This paper		ParB-mCherry plJR962::MSMEG_6366		TRUE
strain, strain background (M. smegmatis)	MSMEG_6367	This paper		ParB-mCherry plJR962::MSMEG_6367		TRUE
strain, strain background (M. smegmatis)	MSMEG_6382	This paper		ParB-mCherry plJR962::MSMEG_6382		TRUE
strain, strain background (M. smegmatis)	MSMEG_6386	This paper		ParB-mCherry plJR962::MSMEG_6386		TRUE
strain, strain background (M. smegmatis)	MSMEG_6391	This paper		ParB-mCherry plJR962::MSMEG_6391		TRUE
strain, strain background (M. smegmatis)	MSMEG_6392	This paper		ParB-mCherry plJR962::MSMEG_6392		TRUE
strain, strain background (M. smegmatis)	MSMEG_6401	This paper		ParB-mCherry plJR962::MSMEG_6401		TRUE
strain, strain background (M. smegmatis)	MSMEG_6403	This paper		ParB-mCherry plJR962::MSMEG_6403		FALSE
strain, strain background (M. smegmatis)	MSMEG_6404	This paper		ParB-mCherry plJR962::MSMEG_6404		FALSE
strain, strain background (M. smegmatis)	MSMEG_6413	This paper		ParB-mCherry plJR962::MSMEG_6413		FALSE
strain, strain background (M. smegmatis)	MSMEG_6520	This paper		ParB-mCherry plJR962::MSMEG_6520		FALSE
strain, strain background (M. smegmatis)	MSMEG_6892	This paper		ParB-mCherry plJR962::MSMEG_6892		FALSE
strain, strain background (M. smegmatis)	MSMEG_6895	This paper		ParB-mCherry plJR962::MSMEG_6895		FALSE
strain, strain background (M. smegmatis)	MSMEG_6896	This paper		ParB-mCherry plJR962::MSMEG_6896		FALSE
strain, strain background (M. smegmatis)	MSMEG_6900	This paper		ParB-mCherry plJR962::MSMEG_6900		FALSE
strain, strain background (M. smegmatis)	MSMEG_6904	This paper		ParB-mCherry plJR962::MSMEG_6904		FALSE
strain, strain background (M. smegmatis)	MSMEG_6917	This paper		ParB-mCherry plJR962::MSMEG_6917		FALSE
strain, strain background (M. smegmatis)	MSMEG_6926	This paper		ParB-mCherry plJR962::MSMEG_6926		FALSE
strain, strain background (M. smegmatis)	MSMEG_6927	This paper		ParB-mCherry plJR962::MSMEG_6927		FALSE
strain, strain background (M. smegmatis)	MSMEG_6928	This paper		ParB-mCherry plJR962::MSMEG_6928		FALSE
strain, strain background (M. smegmatis)	MSMEG_6929	This paper		ParB-mCherry plJR962::MSMEG_6929		FALSE
strain, strain background (M. smegmatis)	MSMEG_6942	This paper		ParB-mCherry plJR962::MSMEG_6942		FALSE
strain, strain background (M. smegmatis)	MSMEG_6946	This paper		ParB-mCherry plJR962::MSMEG_6946		FALSE
strain, strain background (M. smegmatis)	MSMEG_6947	This paper		ParB-mCherry plJR962::MSMEG_6947		FALSE

## Sheet: chemical compounds
Reagent type (species) or resource	Designation	Source or reference	Identifiers	Additional Information
chemical compound, drug	Kanamycin	Sigma-Aldrich	60615-25G
chemical compound, drug	Anhydrotetracycline	Sigma-Aldrich	37919-100MG-R
chemical compound, drug	Bedaquiline	Asclepia	TMC207
chemical compound, drug	Ciprofloxacin	Sigma-Aldrich	17850-5G-F
chemical compound, drug	D-Cycloserine	Sigma-Aldrich	C6880-5G
chemical compound, drug	Ethambutol	Sigma-Aldrich	E4630-25G
chemical compound, drug	Griselimycin	Prof. Rolf Müller, Helmholtz Institute for Pharmaceutical Research Saarland		Natural product, not commercially available. Ref: Kling et al., 2015 Science DOI: 10.1126/science.aaa4690
chemical compound, drug	Isoniazid	Sigma-Aldrich	I0500000
chemical compound, drug	Levofloxacin	Sigma-Aldrich	28266-1G-F
chemical compound, drug	Linezolid	Sigma-Aldrich	PZ0014-25MG
chemical compound, drug	Moxifloxacin	Sigma-Aldrich	SML1581-50MG
chemical compound, drug	Novobiocin	Sigma-Aldrich	N1628-1G
chemical compound, drug	Nargenicin	Biocom Africa	AB144312
chemical compound, drug	Rifampicin	Sigma-Aldrich	R3501-25G
chemical compound, drug	Streptomycin	Sigma-Aldrich	S6501-5G
chemical compound, drug	Trimethoprim	Sigma-Aldrich	T7883-5G
chemical compound, drug	Vancomycin	Sigma-Aldrich	SBR00001-10ML
chemical compound, drug	Resazurin	Sigma-Aldrich	199303-25G
